# 1 Components of genetic associations across 2,138 2 phenotypes in the UK Biobank highlight novel adipocyte 3 biology

4  
5 Yosuke Tanigawa<sup>1\*</sup>, Jiehan Li<sup>2,3\*</sup>, Johanne Marie Justesen<sup>1,2,4</sup>, Heiko Horn<sup>5,6</sup>,  
6 Matthew Aguirre<sup>1,7</sup>, Christopher DeBoever<sup>1,8</sup>, Chris Chang<sup>9</sup>, Balasubramanian Narasimhan<sup>1,10</sup>,  
7 Kasper Lage<sup>5,6,11</sup>, Trevor Hastie<sup>1,10</sup>, Chong Yon Park<sup>2</sup>, Gill Bejerano<sup>1,7,12,13</sup>, Erik Ingelsson<sup>2,3\*+</sup>,  
8 Manuel A. Rivas<sup>1\*+</sup>

- 9 1. Department of Biomedical Data Science, School of Medicine, Stanford University, Stanford, CA, USA.  
10 2. Department of Medicine, Division of Cardiovascular Medicine, Stanford University, Stanford, CA, USA.  
11 3. Stanford Cardiovascular Institute, Stanford University, Stanford, CA 94305.  
12 4. Novo Nordisk Foundation Center for Basic Metabolic Research, Faculty of Health and Medical Sciences,  
13 University of Copenhagen, Copenhagen, Denmark  
14 5. Department of Surgery, Massachusetts General Hospital, Harvard Medical School, Boston, MA, USA.  
15 6. Broad Institute of MIT and Harvard, Cambridge, MA, USA.  
16 7. Department of Pediatrics, Stanford University School of Medicine, Stanford University, Stanford, CA, USA.  
17 8. Department of Genetics, Stanford University, Stanford, CA, USA.  
18 9. Grail, Inc., 1525 O'Brien Drive, Menlo Park, CA, USA.  
19 10. Department of Statistics, Stanford University, Stanford, CA, USA.  
20 11. Institute for Biological Psychiatry, Mental Health Center Sct. Hans, University of Copenhagen, Roskilde, Denmark.  
21 12. Department of Developmental Biology, Stanford University, Stanford, CA, USA.  
22 13. Department of Computer Science, Stanford University, Stanford, CA, USA.

23  
24 \*These authors contributed equally

25 +Corresponding authors

## 26 Abstract

27 To characterize latent components of genetic associations, we applied truncated singular value  
28 decomposition (DeGAs) to matrices of summary statistics derived from genome-wide  
29 association analyses across 2,138 phenotypes measured in 337,199 White British individuals in  
30 the UK Biobank study. We systematically identified key components of genetic associations and  
31 the contributions of variants, genes, and phenotypes to each component. As an illustration of  
32 the utility of the approach to inform downstream experiments, we report putative loss of function  
33 variants, rs114285050 (*GPR151*) and rs150090666 (*PDE3B*), that substantially contribute to  
34 obesity-related traits, and experimentally demonstrate the role of these genes in adipocyte  
35 biology. Our approach to dissect components of genetic associations across human phenotypes  
36 will accelerate biomedical hypothesis generation by providing insights on previously unexplored  
37 latent structures.

## 38 Introduction

39 Human genetic studies have been profoundly successful at identifying regions of the genome  
40 contributing to disease risk<sup>1,2</sup>. Despite these successes, there are challenges to translating  
41 findings to clinical advances, much due to the extreme polygenicity and widespread pleiotropy

42 of complex traits<sup>3-5</sup>. In retrospect, this is not surprising given that most common diseases are  
43 multifactorial. However, it remains unclear exactly which factors, acting alone or in combination,  
44 contribute to disease risk and how those factors are shared across diseases. With the  
45 emergence of sequencing technologies, we are increasingly able to pinpoint alleles, possibly  
46 rare and with large effects, which may aid in therapeutic target prioritization<sup>6-13</sup>. Furthermore,  
47 large population-based biobanks, such as the UK Biobank, have aggregated data across tens of  
48 thousands of phenotypes<sup>14</sup>. Thus, an opportunity exists to characterize the phenome-wide  
49 landscape of genetic associations across the spectrum of genomic variation, from coding to  
50 non-coding, and rare to common.

51 Singular value decomposition (SVD), a mathematical approach developed by differential  
52 geometers<sup>15</sup>, can be used to combine information from several (likely) correlated vectors to form  
53 basis vectors, which are guaranteed to be orthogonal and to explain maximum variance in the  
54 data, while preserving the linear structure that helps interpretation. In the field of human  
55 genetics, SVD is routinely employed to infer genetic population structure by calculating principal  
56 components using the genotype data of individuals<sup>16</sup>.

57 To address the pervasive polygenicity and pleiotropy of complex traits, we propose an  
58 application of truncated SVD (TSVD), a reduced rank approximation of SVD<sup>17-19</sup>, to characterize  
59 the underlying (latent) structure of genetic associations using summary statistics computed for  
60 2,138 phenotypes measured in the UK Biobank population cohort<sup>14</sup>. We applied our novel  
61 approach, referred to as DeGAs – Decomposition of Genetic Associations – to assess  
62 associations among latent components, phenotypes, variants, and genes. We highlight its  
63 application to body mass index (BMI), myocardial infarction (MI), and gallstones, motivated by  
64 high polygenicity in anthropometric traits, global burden, and economic costs, respectively. We  
65 assess the relevance of the inferred key components through GREAT genomic region ontology  
66 enrichment analysis<sup>20</sup> and functional experiments. Further, we experimentally demonstrate a  
67 role of newly discovered obesity-related genes in adipocyte biology.

## 68 Results

### 69 DeGAs method overview

70 We generated summary statistics by performing genome-wide association studies (GWAS) of  
71 2,138 phenotypes from the UK Biobank (Fig. 1a, Supplementary Tables S1-S2). We perform  
72 variant-level quality control, which includes linkage-disequilibrium (LD) pruning and removal of  
73 variants in the MHC region, to focus on 235,907 variants for subsequent analyses. Given the  
74 immediate biological consequence, subsequent downstream implications, and medical  
75 relevance of predicted protein-truncating variants (PTVs), commonly referred to as loss-of-  
76 function variants<sup>12,21,22</sup>, we perform separate analyses on two variant sets: (1) all directly-  
77 genotyped variants and (2) PTVs (Supplementary Fig. S1). To eliminate unreliable estimates of  
78 genetic associations, we selected associations with p-values < 0.001, and standard error of beta  
79 value or log odds ratio of less than 0.08 and 0.2, respectively, for each dataset. The Z-scores of  
80 these associations were aggregated into a summary statistic matrix  $W$  of size  $N \times M$ , where  $N$   
81 and  $M$  denote the number of phenotypes and variants, respectively.  $N$  and  $M$  were 2,138 and

82 235,907 for the “all” variant group; and 628 and 784 for the PTV group. The rows and columns  
83 of  $W$  correspond to the GWAS summary statistics of a phenotype and the phenome-wide  
84 association study (PheWAS) of a variant, respectively. We applied TSVD to each matrix and  
85 obtained a decomposition into three matrices  $W = USV^T$  (U: phenotype, S: variance, V: variant).  
86 This reduced representation of  $K = 100$  components altogether explained 41.9% (all) and  
87 75.5% (PTVs) of the variance in the original summary statistic matrices (Fig. 1b-c, Methods,  
88 Supplementary Fig. S2).

89 To characterize each latent component, we defined phenotype squared cosine score,  
90 phenotype contribution score, variant contribution score, and gene contribution score. The  
91 squared cosine scores quantifies the relative importance of component for a given phenotype or  
92 gene, and are defined based on the squared distance of a component from the origin on the  
93 latent space<sup>23</sup> (Fig. 1d, Methods). Contribution scores quantify relative importance of a  
94 phenotype, variant, or gene to a given component and is defined based on the squared distance  
95 of a phenotype, variant, or gene from the origin (Fig. 1d). We then performed biological  
96 characterization of DeGAs latent components with the genomic region enrichment analysis tool  
97 (GREAT)<sup>20</sup> followed by functional experiments in adipocytes (Fig. 1e).

## 98 Characterization of latent structures of DeGAs

99 The PCA plots show the projection of phenotypes and variants onto DeGAs latent components.  
100 (Fig. 2a-b). For the variant plot, we overlay biplot annotation as arrows to interpret the direction  
101 of the components (Fig. 2b). Overall, we find that the first five principal components of genetic  
102 associations can be attributed to: 1) fat-free mass that accounts for the “healthy part” of body  
103 weight<sup>24</sup> (32.7%, Supplementary Table S3) and two intronic variants in *FTO* (rs17817449:  
104 contribution score of 1.15% to PC1, rs7187961: 0.41%); and a genetic variant proximal to  
105 *AC105393.1* (rs62106258: 0.46%); 2) whole-body fat mass (61.5%) and the same three *FTO*  
106 and *AC105393.1* variants (rs17817449: 0.97%, rs7187961: 0.28%, rs62106258: 0.27%); 3)  
107 bioelectrical impedance measurements (38.7%), a standard method to estimate body fat  
108 percentage<sup>25,26</sup>, and genetic variants proximal to *ACAN* (rs3817428: 0.64%), *ADAMTS3*  
109 (rs11729800: 0.31%), and *ADAMTS17* (rs72770234: 0.29%); 4) eye meridian measurements  
110 (80.9%), and two intronic variants in *WNT7B* (rs9330813: 5.73%, rs9330802: 1.14%) and a  
111 genetic variant proximal to *ATXN2* (rs653178: 0.96%); and 5) bioelectrical impedance and  
112 spirometry measures (45.4% and 26.0%, respectively) and genetic variants proximal to *FTO*  
113 (rs17817449: 0.17%), *ADAMTS3* (rs11729800: 0.11%), and *PSMC5* (rs13030: 0.11%) (Fig. 2c-  
114 d, Supplementary Table S4).

## 115 Applying DeGAs components for BMI, MI, and gallstones

116 To illustrate the application of DeGAs in characterizing the genetics of complex traits, we  
117 selected three phenotypes, BMI, MI, and gallstones given the large contribution of  
118 anthropometric traits on the first five components, that ischemic heart diseases is a leading  
119 global fatal and non-fatal burden, and that gallstones is a common condition with severe pain  
120 and large economic costs where polygenic risk factors are largely unknown<sup>27,28</sup>. We identified

121 the top three key components for these three phenotypes with DeGAs using the “all” variants  
122 dataset.

123 For BMI, we find that the top three components of genetic associations (PC2, PC1, and  
124 PC30) altogether explained over 69% of the genetic associations (47%, 18%, and 4%,  
125 respectively, Supplementary Fig. S3a). The top two components (PC2 and PC1) corresponded  
126 to components of body fat (PC2) and fat-free mass measures (PC1), as described above. PC30  
127 was driven by fat mass (28.7%) and fat-free mass (6.8%), but also by non-melanoma skin  
128 cancer (7.72%) – linked to BMI in epidemiological studies<sup>29</sup> – and childhood sunburn (7.61%)  
129 (Fig. 3a, Supplementary Table S4).

130 For MI, a complex disease influenced by multiple risk factors<sup>30</sup>, we found that the top  
131 components were attributed to genetics of lipid metabolism (PC22, high-cholesterol, statin  
132 intake, and *APOC1*), alcohol intake (PC100), and sleep duration and food intake (PC83, 25.2%)  
133 that collectively corresponded to 36% of the genetic associations (Fig. 3a, Supplementary Fig.  
134 S3b, S4-S5, Supplementary Table S4).

135 Cholelithiasis is a disease involving the presence of gallstones, which are concretions  
136 that form in the biliary tract, usually in the gallbladder<sup>31</sup>. We found that the top components  
137 contributing to gallstones corresponded to associations with fresh fruit (PC72) and water intake  
138 (PC64), as well as bioelectrical impedance of whole body (PC67) corresponding to 51% of  
139 genetic associations altogether (Fig. 3a, Supplementary Fig. S3c, S4, S6, Supplementary Table  
140 S4).

## 141 Biological characterization of DeGAs components

142 To provide biological characterization of the key components, we applied the genomic region  
143 enrichment analysis tool (GREAT)<sup>20</sup> to dissect the biological relevance of the identified  
144 components with the both coding and non-coding variants. Given the coverage of the manually  
145 curated knowledge of mammalian phenotypes, we focused on the mouse genome informatics  
146 (MGI) phenotype ontology<sup>32</sup>. For each key component, we applied GREAT and found an  
147 enrichment for the mouse phenotypes consistent with the phenotypic description of our  
148 diseases of interest<sup>20</sup>. The top component for BMI, identified as the body fat measures  
149 component (PC2), showed enrichment of several anthropometric terms including abnormally  
150 short feet (brachypodia) (MP:0002772, binomial fold = 9.04,  $p = 1.3 \times 10^{-23}$ ), increased birth  
151 weight (MP:0009673, fold = 6.21,  $p = 1.3 \times 10^{-11}$ ), and increased body length (MP:0001257,  
152 binomial fold = 3.01,  $p = 1.3 \times 10^{-36}$ ) (Fig. 3B, Supplementary Table S5). For MI, we found  
153 enrichment of cardiac terms, such as artery occlusion (PC22, MP:0006134, fold = 15.86,  $p =$   
154  $1.14 \times 10^{-25}$ ) and aortitis (PC22, MP:0010139, aorta inflammation, fold = 9.36,  $p =$   
155  $3.41 \times 10^{-31}$ ) (Supplementary Fig. 7, Supplementary Table S6). Similarly, for gallstones, the  
156 top enrichment was for abnormal circulating phytosterol level (PC72, MP:0010075, fold = 11.54,  
157  $p = 5.51 \times 10^{-11}$ ), which is known to be involved in gallstone development<sup>33</sup> (Supplementary  
158 Fig. 8, Supplementary Table S7).

## 159 Protein truncating variants

160 Predicted PTVs are a special class of genetic variants with possibly strong effects on gene  
161 function<sup>9,12,21,34</sup>. More importantly, strong effect PTV-trait associations can uncover promising  
162 drug targets, especially when the direction of effect is consistent with protection of human  
163 disease. Given the challenges with interpreting genetic associations across thousands of  
164 possibly correlated phenotypes, we applied DeGAs to PTV gene-phenotype associations. We  
165 identified PC1 and PC3 as the top two key components for BMI, with 28% and 12% of  
166 phenotype squared contribution scores, respectively (Supplementary Fig. S9). The major drivers  
167 of PC1 were weight-related measurements, including left and right leg fat-free mass (5.0% and  
168 3.7% of phenotype contribution score for PC1, respectively), left and right leg predicted mass  
169 (4.9% each), weight (4.6%), and basal metabolic rate (4.6%), whereas the drivers of PC3  
170 included standing height (13.7%), sitting height (8.1%), and high reticulocyte percentage (6.4%)  
171 (Fig. 4a, Supplementary Table S4). Top contributing PTVs to PC1 included variants in *PDE3B*  
172 (19.0%), *GPR151* (12.3%), and *ABTB1* (8.5%), whereas PC3 was driven by PTVs on *TMEM91*  
173 (8.6%), *EML2-AS1* (6.7%), and *KIAA0586* (6.0%) (Fig. 4b, Supplementary Table S4).

174 Based on stop-gain variants in *GPR151* (rs114285050) and *PDE3B* (rs150090666)  
175 being key contributors to the top two components of genetic associations for PTVs and BMI  
176 (Fig. 4c), we proceeded to detailed phenome-wide association analysis (PheWAS) assessing  
177 associations of these PTVs with anthropometric phenotypes. PheWAS analysis of these  
178 variants confirmed strong associations with obesity-related phenotypes including waist  
179 circumference (*GPR151*, marginal association beta = -0.065,  $p = 2.5 \times 10^{-8}$ ), whole-body fat  
180 mass (*GPR151*, beta = -0.069,  $p = 1.4 \times 10^{-7}$ ), trunk fat mass (*GPR151*, beta = -0.071,  $p =$   
181  $1.5 \times 10^{-7}$ ), hip circumference (*PDE3B*, beta = 0.248,  $p = 1.8 \times 10^{-11}$ ), right leg fat-free mass  
182 (*PDE3B*, beta = 0.129,  $p = 4.2 \times 10^{-8}$ ) and body weight (*PDE3B*, beta = 0.177,  $p = 4.6 \times 10^{-8}$ )  
183 (Fig. 4d, Supplementary Fig. S10, Supplementary Table S8-9). Among 337,199 White British  
184 individuals, we found 7,560 heterozygous and 36 homozygous carriers of the *GPR151* variant  
185 and 947 heterozygous carriers of *PDE3B* variants. To assess the effect of the PTVs on BMI, a  
186 commonly-used measure of obesity, we performed univariate linear regression analysis with  
187 age, sex, and the first four genetic PCs as covariates and found that heterozygous and carriers  
188 of *GPR151* PTVs showed 0.324 kg/m<sup>2</sup> lower BMI than the average UK Biobank participant ( $p =$   
189  $4.13 \times 10^{-7}$ ). We did not find evidence of association with homozygous carriers ( $N = 28$ ;  $p =$   
190 0.665), presumably due to lack of power (Supplementary Fig. S11). Heterozygous carriers of  
191 *PDE3B* PTVs showed 0.647 kg/m<sup>2</sup> higher BMI ( $p = 2.09 \times 10^{-4}$ ) than the average UK Biobank  
192 participant (Supplementary Fig. S12).

## 193 Functional experiments for candidate genes in cellular models of 194 adipocytes

195 We sought to illustrate the potential application of DeGAs in prioritizing therapeutic targets using  
196 functional follow-up experiments. Several of our most interesting findings were observed for  
197 obesity-related traits, including the top two candidate genes (*PDE3B* and *GPR151*) contributing  
198 to PC1 – the leading component associated with obesity. For this reason, we chose to study  
199 these two genes in relation to adipocyte biology. Specifically, the expression and function of

200 *PDE3B* and *GPR151* were evaluated in mouse 3T3-L1 and human Simpson-Golabi-Behmel  
201 Syndrome (SGBS) cells, two well-established preadipocyte models used for studying adipocyte  
202 differentiation (i.e. adipogenesis) and function<sup>35,36</sup>.

203 First, we demonstrated that both genes were expressed in preadipocytes, but showed  
204 different expression patterns when cells were transforming into mature adipocytes: *PDE3B*  
205 increased dramatically during both mouse and human adipogenesis, while *GPR151* maintained  
206 a low expression level throughout the differentiation (Fig. 5a-b). Next, to explore the causal  
207 relationships between gene expression and adipogenesis, we introduced short interfering RNA  
208 (siRNA) against *Pde3b* and *Gpr151*, respectively, into 3T3-L1 preadipocytes and monitored the  
209 impact of gene knockdown on conversion of preadipocytes to adipocytes. Knockdown of  
210 *Gpr151* (Fig. 5c) drastically impaired adipocyte differentiation, as evidenced by lowered  
211 expression of adipogenesis markers (*Pparg*, *Cebpa* and *Fabp4*) (Fig. 5d), as well as the  
212 reduced formation of lipid-containing adipocytes (Fig. 5e-f). Further, to test the functional  
213 capacity of the fat cells lacking *Gpr151*, we performed a lipolysis assay - an essential metabolic  
214 pathway of adipocytes and thus, a key indicator of adipocyte function - on mature adipocytes  
215 derived from preadipocytes transfected with either scrambled siRNA (scRNA) or si*Gpr151*. Not  
216 surprisingly, *Gpr151*-deficient lipid-poor adipocytes showed dramatically lower lipolysis, along  
217 with impaired capability of responding to isoproterenol (ISO), a  $\beta$ -adrenergic stimulus of lipolysis  
218 (Fig. 5g). These data suggest that *GPR151* knockdown in adipocyte progenitor cells may block  
219 their conversion into mature adipocytes; thus, preventing the expansion of adipose tissue.  
220 These results are directionally consistent with our DeGAs and univariate regression analysis  
221 showing that *GPR151* PTVs are associated with lower obesity and fat mass, especially central  
222 obesity (e.g. waist circumference and trunk fat mass) (Fig. 4d).

223 To further analyze the functional impact of GPR151 in adipocytes, we generated an  
224 overexpression model of GPR151 by infecting 3T3-L1 preadipocytes with virus expressing Flag-  
225 tagged human *GPR151* driven by either EF1 $\alpha$  or aP2 promotor (Supplementary Fig. S13a).  
226 Overexpression of *GPR151* by both constructs were confirmed at the gene and protein levels  
227 (Supplementary Fig. S13b-d). However, despite the substantial effect of *Gpr151* knockdown on  
228 adipogenesis (Fig. 5), overexpression of *GPR151* in preadipocytes failed to influence adipocyte  
229 differentiation significantly, as shown by similar levels of adipogenic markers compared to the  
230 non-infected controls (Supplementary Fig. S13e-f). To eliminate the potential masking effects of  
231 any unperturbed cells in the partially infected cell population, we specifically selected *GPR151*-  
232 overexpressing cells by staining Flag-*GPR151* positive cells with APC-conjugated flag antibody  
233 (Supplementary Fig. S13g-h) and sorted APC+ and APC- cells from the differentiating adipocyte  
234 cultures. In both EF1 $\alpha$ - and aP2-driven *GPR151* overexpression models, *GPR151* mRNA levels  
235 were enriched in APC+ cells compared to APC- cells. However, APC+ cells expressed genes  
236 characteristics of differentiating adipocytes in a similar level to that of APC- cells  
237 (Supplementary Fig. S13i-j). These data conclude that overexpression of GPR151 in  
238 preadipocytes cannot further enhance adipogenesis, suggesting that the endogenous level of  
239 GPR151 in preadipocytes may be sufficient to maintain the normal differentiation potential of  
240 preadipocytes. Although GPR151 is predominantly expressed in the brain, especially in  
241 hypothalamic neurons that control appetite and energy expenditure<sup>37</sup>, we identified for the first  
242 time that the GPR151 protein is present in both subcutaneous and visceral adipose tissue from  
243 mice (SAT and VAT), albeit in a very low level (Supplementary Fig. S13k). Together with our

244 gain- and loss-of-function studies of *GPR151* in preadipocyte models, we infer that the  
245 regulatory role of *GPR151* in body weight may involve both central and peripheral effects. The  
246 minimal but indispensable presence of GPR151 in adipose progenitor cells in generating lipid-  
247 rich adipocytes seems to represent an important mechanism by which GPR151 promotes  
248 obesity.

249 In contrast to *GPR151*, knockdown of *Pde3b* in 3T3-L1 preadipocytes (Supplementary  
250 Fig. S14a) showed no significant influence on adipogenesis and lipolysis (under either basal or  
251  $\beta$ -adrenergic stimulated conditions), as compared to scRNA-transfected controls  
252 (Supplementary Fig. S14b-e). Since PDE3B is expressed primarily in differentiated adipocytes  
253 (Fig. 5a-b), future research efforts should be concentrated on studying the metabolic role of  
254 PDE3B in mature adipocytes. As an essential enzyme that hydrolyzes both cAMP and cGMP,  
255 PDE3B is known to be highly expressed in tissues that are important in regulating energy  
256 homeostasis, including adipose tissue<sup>38</sup>. *Pde3b* whole-body knockout in mice reduces the  
257 visceral fat mass<sup>39</sup> and confers cardioprotective effects<sup>40</sup>. There is a growing body of evidence  
258 that cardiometabolic health is linked to improved body fat distribution (i.e. lower visceral fat,  
259 higher subcutaneous fat) in a consistent direction<sup>41</sup>. Our PheWAS analysis suggests that  
260 *PDE3B* PTVs have the strongest association with subcutaneous and lower-body adiposity (e.g.  
261 hip and leg fat mass) (Supplementary Fig. S10). Therefore, understanding the fat depot-specific  
262 metabolic effects of PDE3B may help uncover the mechanism underlying the positive  
263 relationship of *PDE3B* PTVs with peripheral fat accumulation and favorable metabolic profiles.

## 264 Discussion

265 We developed DeGAs, an application of TSVD, to decompose genome-and phenome-wide  
266 summary statistic matrix from association studies of thousands of phenotypes for systematic  
267 characterization of latent components of genetic associations. Applying DeGAs, we identified  
268 key latent components characterized with disease outcomes, risk factors, comorbidity  
269 structures, and environmental factors, with corresponding sets of genes and variants, providing  
270 insights on their context specific functions. With additional biological characterization of latent  
271 components using GREAT, we find enrichment of relevant phenotypes in mouse phenotype  
272 ontology. This replication across species highlights the ability of DeGAs to capture functionally  
273 relevant sets of both coding and non-coding variants in each component.

274 Given that DeGAs is applied on summary statistics and does not require individual level  
275 data, there is substantial potential to dissect genetic components of the human phenome when  
276 applied to data from population-based biobanks around the globe<sup>14,42-45</sup>. As a proof of concept,  
277 we report novel potential therapeutic targets against obesity or its complications based on  
278 combination of quantitative results from DeGAs, phenome-wide analyses in the UK Biobank,  
279 and functional studies in adipocytes.

280 Taken together, we highlight the directional concordance of our experimental data with  
281 the quantitative results from DeGAs and PTV-phenotype associations: *GPR151* inhibition may  
282 reduce total body and central fat, while deletion of *PDE3B* may favor subcutaneous, rather than  
283 visceral, fat deposition; both are expected to have beneficial effects on cardiometabolic health.  
284 Although these two genes were recently reported to be associated with obesity in another  
285 recent study based on the UK Biobank<sup>46</sup>, we are the first to experimentally identify *GPR151* as a

286 promising therapeutic target to treat obesity, partly due to its requisite role in regulating  
287 adipogenesis. We also suggest *PDE3B* as a potential target of adipocyte-directed therapy. In  
288 this study, we focused on evaluating the functional effects of these genes on adipocyte function  
289 and development. We do not exclude the contribution nor the importance of other tissues or  
290 mechanisms underlying body weight changes. Indeed, some lines of evidence support  
291 additional effects of *GPR151* on obesity via the central nervous system – possibly on appetite  
292 regulation<sup>37</sup>.

293 The resource made available with this study, including the DeGAs app, an interactive  
294 web application in the Global Biobank Engine<sup>47</sup>, provides a starting point to investigate genetic  
295 components, their functional relevance, and new therapeutic targets. These results highlight the  
296 benefit of comprehensive phenotyping on a population and suggest that systematic  
297 characterization and analysis of genetic associations across the human phenome will be an  
298 important part of efforts to understand biology and develop novel therapeutic approaches.

## 299 Methods

### 300 Study population

301 The UK Biobank is a population-based cohort study collected from multiple sites across the  
302 United Kingdom. Information on genotyping and quality control has previously been described<sup>14</sup>.  
303 In brief, study participants were genotyped using two similar arrays (Applied Biosystems UK  
304 BiLEVE Axiom Array (807,411 markers) and the UK Biobank Axiom Array (825,927 markers)),  
305 which were designed for the UK Biobank study. The initial quality control was performed by the  
306 UK Biobank analysis team and designed to accommodate the large-scale dataset of ethnically  
307 diverse participants, genotyped in many batches, using two similar novel arrays<sup>14</sup>.

### 308 Genotype data preparation

309 We used genotype data from the UK Biobank dataset release version 2<sup>14</sup> and the hg19 human  
310 genome reference for all analyses in the study. To minimize the variabilities due to population  
311 structure in our dataset, we restricted our analyses to include 337,199 White British individuals  
312 based on the following five criteria reported by the UK Biobank in the file “ukb\_sqc\_v2.txt”:

- 313 1. self- reported white British ancestry (“in\_white\_British\_ancestry\_subset” column)
- 314 2. used to compute principal components (“used\_in\_pca\_calculation” column)
- 315 3. not marked as outliers for heterozygosity and missing rates (“het\_missing\_outliers”  
316 column)
- 317 4. do not show putative sex chromosome aneuploidy (“putative\_sex\_chromo-  
318 some\_aneuploidy” column)
- 319 5. have at most 10 putative third-degree relatives (“excess\_relatives” column).

320  
321 We annotated variants using the VEP LOFTEE plugin (<https://github.com/konradjk/loftee>) and  
322 variant quality control by comparing allele frequencies in the UK Biobank and gnomAD  
323 (gnomad.exomes.r2.0.1.sites.vcf.gz) as previously described<sup>12</sup>.



324 We focused on variants outside of major histocompatibility complex (MHC) region  
325 (chr6:25477797-36448354) and performed LD pruning using PLINK with "--indep 50 5 2".  
326 Furthermore, we selected variants according to the following rules:  
327 

- Missingness of the variant is less than 1%.
- Minor-allele frequency is greater than 0.01%.
- The variant is in the LD-pruned set.
- Hardy-Weinberg disequilibrium test p-value is greater than  $1.0 \times 10^{-7}$ .
- Manual cluster plot inspection. We investigated cluster plots for subset of our variants  
332 and removed 11 variants that has unreliable genotype calls as previously described<sup>12</sup>.
- Passed the comparison of minor allele frequency with gnomAD dataset as previously  
334 described<sup>12</sup>.

  
335 These variant filters are summarized in Supplementary Fig. S1.

## 336 Phenotype data preparation

337 We organized 2,138 phenotypes from the UK Biobank in 11 distinct groups (Supplementary  
338 Table 1). We included phenotypes with at least 100 cases for binary phenotypes and 100  
339 individuals with non-missing values for quantitative phenotypes. For disease outcome  
340 phenotypes, cancer, and family history, we used the same definitions as previously described<sup>12</sup>.  
341 We used specific data fields and data category from the UK Biobank to define the phenotypes in  
342 the following categories as well as 19 and 42 additional miscellaneous binary and quantitative  
343 phenotypes: medication, imaging, physical measurements, assays, and binary and quantitative  
344 questionnaire (Supplementary Table 1-2).

345 Some phenotype information from the UK Biobank contains three instances, each of  
346 which corresponds to (1) the initial assessment visit (2006-2010), (2) first repeat assessment  
347 visit (2012-2013), and (3) imaging visit (2014-). For binary phenotype, we defined "case" if the  
348 participants are classified as case in at least one of their visits and "control" otherwise. For  
349 quantitative phenotype, we took a median of non-NA values. In total, we defined 1,196 binary  
350 phenotypes and 943 quantitative phenotypes.

## 351 Genome-wide association analyses of 2,138 phenotypes

352 Association analyses for single variants were applied to the 2,138 phenotypes separately. For  
353 binary phenotypes, we performed Firth-fallback logistic regression using PLINK v2.00a (17 July  
354 2017) as previously described<sup>12,48</sup>. For quantitative phenotypes, we applied generalized linear  
355 model association analysis with PLINK v2.00a (20 Sep. 2017). We applied quantile  
356 normalization for phenotype (--pheno-quantile-normalize option), where we fit a linear model  
357 with covariates and transform the phenotypes to normal distribution  $N(0, 1)$  while preserving the  
358 original rank. We used the following covariates in our analysis: age, sex, types of genotyping  
359 array, and the first four genotype principal components computed from the UK Biobank.

## 360 Summary statistic matrix construction and variant filters

361 We constructed two Z-score summary statistic matrices. Each element of the matrix  
362 corresponds to summary statistic for a particular pair of a phenotype and a variant. We imposed  
363 different sets of variant filters.

- 364 • Variant quality control filter: Our quality control filter described in the previous section on  
365 genotype data preparation.
- 366 • Non-MHC variant filter: All variants outside of major histocompatibility complex region.  
367 With this filter, variants in chr6:25477797-36448354 were excluded from the summary  
368 statistic matrix.
- 369 • PTVs-only: With this filter, we subset to include only the variants having the VEP  
370 LOFTEE predicted consequence of: stop gain, frameshift, splice acceptor, or splice  
371 donor.

372 By combining these filters, we defined the following sets of variants

- 373 • All-non-MHC: This is a combination of our variant QC filter and non-MHC filter.
- 374 • PTVs-non-MHC: This is a combination of our variant QC filter, non-MHC filter, and PTVs  
375 filter.

376 In addition to phenotype quality control and variant filters, we introduced value-based filters  
377 based on statistical significance to construct summary statistic matrices only with confident  
378 values. We applied the following criteria for the value filter:

- 379 • P-value of marginal association is less than 0.001.
- 380 • Standard error of beta value or log odds ratio is less than 0.08 for quantitative  
381 phenotypes and 0.2 for binary phenotypes.

382 With these filters, we obtained the following two matrices:

- 383 • All-non-MHC dataset that contains 2,138 phenotypes and 235,907 variants. We label  
384 this dataset as **“all” dataset**.
- 385 • “PTVs-non-MHC” dataset that contains 628 phenotypes and 784 variants. We label this  
386 dataset as **“PTVs only” dataset**. This contains a fewer number of phenotypes because  
387 not all the phenotypes have statistically significant associations with PTVs.

388 The effects of variant filters are summarized in Fig. S1. Finally, we transformed the summary  
389 statistics to Z-scores so that each vector that corresponds to a particular phenotype has zero  
390 mean with unit variance.

## 391 Truncated singular value decomposition of the summary statistic 392 matrix

393 For each summary statistic matrix, we applied truncated singular value decomposition (TSVD).  
394 The matrix, which we denote as  $W$ , of size  $N \times M$ , where  $N$  denotes the number of phenotypes  
395 and  $M$  denotes the number of variants, is the input data. With TSVD,  $W$  is factorized into a  
396 product of three matrices:  $U$ ,  $S$ , and  $V^T$ :  $W = USV^T$ , where  $U = (u_{i,k})_{i,k}$  is an orthonormal  
397 matrix of size  $N \times K$  whose columns are phenotype (left) singular vectors,  $S$  is a diagonal matrix  
398 of size  $K \times K$  whose elements are singular values, and  $V = (v_{j,k})_{j,k}$  is an orthonormal matrix of  
399 size  $M \times K$  whose columns are variant (right) singular vectors. While singular values in  $S$

400 represent the magnitude of the components, singular vectors in  $U$  and  $V$  summarizes the  
401 strength of association between phenotype and component and variant and component,  
402 respectively. With this decomposition, the  $k$ -th latent component (principal component, PC  $k$ )  
403 are represented as a product of  $k$ -th column of  $U$ ,  $k$ -th diagonal element in  $S$ , and  $k$ -th row of  
404  $V^T$ . We used implicitly restarted lanczos bidiagonalization algorithm (IRLBA)<sup>49</sup>  
405 (<https://github.com/bwlewis/irlba>) implemented on SciDB<sup>50</sup> to compute the first  $K$  components in  
406 this decomposition.

## 407 Relative variance explained by each of the components

408 A scree plot (Fig. S1) quantify the variance explained by each component: variance explained  
409 by  $k$ -th component =  $s_k^2 / \text{Var}_{\text{Tot}}(W)$  where,  $s_k$  is the  $k$ -th diagonal element in the diagonal matrix  
410  $S$  and  $\text{Var}_{\text{Tot}}(W)$  is the total variance of the original matrix before DeGAs is applied.

## 411 Selection of number of latent components in TSVD

412 In order to apply TSVD to the input matrix, the number of components should be specified. We  
413 apply  $K = 100$  for our analysis for both datasets. We computed the expected value of squared  
414 eigenvalues under the null model where the distribution of variance explained scores across the  
415 full-ranks are uniform. This can be computed with the rank of the original matrix, which is equal  
416 to the number of phenotypes in our datasets:

$$417 \quad E[\text{Variance explained by } k\text{-th component under the null}] = 1 / (\text{Rank}(W)^2)$$

418 For all of the two datasets, we found that that of 100-th component is greater than the  
419 expectation. This indicates even the 100-th components are informative to represent the  
420 variance of the original matrix. In the interest of computational efficiency, we set  $K = 100$ .

## 421 Factor scores

422 From these decomposed matrices, we computed **factor score** matrices for both phenotypes  
423 and variants as the product of singular vector matrix and singular values. We denote the one for  
424 phenotypes as  $F_p = (f_{i,j}^p)_{i,j}$  the one for variants as  $F_v = (f_{i,j}^v)_{i,j}$  and defined as follows:

$$425 \quad F_p = US$$
$$426 \quad F_v = VS$$

427 Since these factor scores are mathematically the same as principal components in principal  
428 component analysis (PCA), one can investigate the contribution of the phenotypes or variants  
429 for specific principal components by simply plotting factor scores<sup>23</sup> (Fig. 2a-b). Specifically,  
430 phenotype factor score is the same as phenotype principal components and variant factor score  
431 is the same as variant principal components. By normalizing these factor scores, one can  
432 compute contribution scores and cosine scores to quantify the importance of phenotypes,  
433 variants, and principal components as described below.

## 434 Scatter plot visualization with biplot annotations

435 To investigate the relationship between phenotype and variants in the TSVD eigenspace, we  
436 used a variant of biplot visualization<sup>51,52</sup>. Specifically, we display phenotypes projected on  
437 phenotype principal components ( $F_p = US$ ) as a scatter plot. We also show variants projected on  
438 variant principal components ( $F_v = VS$ ) as a separate scatter plot and added phenotype singular  
439 vectors ( $U$ ) as arrows on the plot using sub-axes (Fig. 2b, 4c, S5-6). In scatter plot with biplot  
440 annotation, the inner product of a genetic variant and a phenotype represents the direction and  
441 the strength of the projection of the genetic association of the variant-phenotype pair on the  
442 displayed latent components. For example, when a variant and a phenotype share the same  
443 direction on the annotated scatter plot, that means the projection of the genetic associations of  
444 the variant-phenotype pair on the displayed latent components is positive. When a variant-  
445 phenotype pair is projected on the same line, but on the opposite direction, the projection of the  
446 genetic associations on the shown latent components is negative. When the variant and  
447 phenotype vectors are orthogonal or one of the vectors are of zero length, the projection of the  
448 genetic associations of the variant-phenotype pair on the displayed latent components is zero.  
449 Given the high dimensionality of the input summary statistic matrix, we selected relevant  
450 phenotypes to display to help interpretation of genetic associations in the context of these traits.

## 451 Contribution scores

452 To quantify the contribution of the phenotypes, variants, and genes to a given component, we  
453 compute **contribution scores**. We first define **phenotype contribution score** and **variant**  
454 **contribution score**. We denote phenotype contribution score and variant contribution score for  
455 some component  $k$  as  $\text{cntr}_k^{\text{phe}}(i)$  and  $\text{cntr}_k^{\text{var}}(j)$ , respectively. They are defined by squaring the  
456 left and right singular vectors and normalizing them by Euclidian norm across phenotypes and  
457 variants:

$$458 \quad \text{cntr}_k^{\text{phe}}(i) = (u_{i,k})^2$$

$$459 \quad \text{cntr}_k^{\text{var}}(j) = (v_{i,k})^2$$

460 where,  $i$  and  $j$  denote indices for phenotype and variant, respectively. Because  $U$  and  $V$  are  
461 orthonormal, the sum of phenotype and variant contribution scores for a given component are  
462 guaranteed to be one, i.e.  $\sum_i \text{cntr}_k^{\text{phe}}(i) = \sum_j \text{cntr}_k^{\text{var}}(j) = 1$ .

463 Based on the variant contribution scores for the  $k$ -th component, we define the **gene**  
464 **contribution score** for some component  $k$  as the sum of variant contribution scores for the set  
465 of variants in the gene:

$$466 \quad \text{cntr}_k^{\text{gene}}(g) = \sum_{j \in g} \text{cntr}_k^{\text{var}}(j)$$

467 where,  $g$  denotes indices for the set of variants in gene  $g$ . To guarantee that gene contribution  
468 scores for a given component sum up to one, we treat the variant contribution score for the non-  
469 coding variants as gene contribution scores. When multiple genes,  $g_1, g_2, \dots, g_n$  are sharing the  
470 same variants, we defined the gene contribution score for the union of multiple genes rather  
471 than each gene:

$$472 \quad \text{cntr}_k^{\text{gene}}(\{g_i \mid i \in [1, n]\}) = \sum_{\{j \mid j \in g_1 \wedge j \in g_2 \wedge \dots \wedge j \in g_n\}} \text{cntr}_k^{\text{var}}(j)$$

473 With these contribution score for a given component, it is possible to quantify the relative  
 474 importance of a phenotype, variant, or gene to the component. Since DeGAs identifies latent  
 475 components using unsupervised learning, we interpret each component in terms of the driving  
 476 phenotypes, variants, and genes, i.e. the ones with large contribution scores for the component.

477 The top 20 driving phenotypes, variants, and genes (based on contribution scores) for  
 478 the top five TSVD components and the top three key components for our phenotypes of interest  
 479 are summarized in Supplementary Table S3.

480 We used stacked bar plots for visualization of the contribution score profile for each of  
 481 the components. We represent phenotypes, genes, or variants with large contribution scores as  
 482 colored segments and aggregated contributions from the remaining ones as “others” in the plot  
 483 (Fig. 2c-d, 3a, 4a-b, Supplementary Fig. S4). To help interpretation of the major contributing  
 484 factors for the key components, we grouped phenotypes into categories, such as “fat”, “fat-free”  
 485 phenotypes, and showed the sum of contribution scores for the phenotype groups. The list of  
 486 phenotype groups used in the visualization is summarized in Supplementary Table S3.

## 487 Squared cosine scores

488 Conversely, we can also quantify the relative importance of the latent components for a given  
 489 phenotype or variant with **squared cosine scores**. We denote phenotype squared cosine score  
 490 for some phenotype  $i$  and variant squared cosine score for some variant  $j$  as  $\cos^2_i^{\text{phe}}(k)$  and  
 491  $\cos^2_j^{\text{var}}(k)$ , respectively. They are defined by squaring of the factor scores and normalizing  
 492 them by Euclidian norm across components:

$$493 \quad \cos^2_i^{\text{phe}}(k) = \frac{(f_{i,k}^p)^2}{\sum_{k'} (f_{i,k'}^p)^2}$$

$$494 \quad \cos^2_j^{\text{var}}(k) = \frac{(f_{j,k}^v)^2}{\sum_{k'} (f_{j,k'}^v)^2}$$

495 By definition, the sum of squared cosine scores across a latent component for a given  
 496 phenotype or variant equals to one, i.e.  $\sum_k \cos^2_i^{\text{phe}}(k) = \sum_k \cos^2_j^{\text{var}}(k) = 1$ . While singular  
 497 values in the diagonal matrix  $S$  quantify the importance of latent components for the global latent  
 498 structure, the phenotype or variant squared cosine score quantifies the relative importance of  
 499 each component in the context of a given phenotype or a variant. The squared cosine scores for  
 500 the phenotypes highlighted in the study is summarized in Fig. S3 and Supplementary Fig. S9.

501 Note that squared cosine scores and contribution scores are two complementary scoring  
 502 metrics to quantify the relationship among phenotypes, components, variants, and genes. It  
 503 does not necessarily have inverse mapping property. For example, it is possible to see a  
 504 situation, where for a given phenotype  $p$ , phenotype squared cosine score identifies  $k$  as the top  
 505 key component, but phenotype contribution score for  $k$  identifies  $p'$  ( $p' \neq p$ ) as the top driving  
 506 phenotype for the component  $k$ . This is because the two scores, contribution score and squared  
 507 cosine score, are both defined by normalizing singular vector and principal component vector  
 508 matrices, respectively, but with respect to different slices: one for row and the other for column.

## 509 Genomic region enrichment analysis with GREAT

510 We applied the genomic region enrichment analysis tool (GREAT version 4.0.3) to each DeGAs  
511 components<sup>20</sup>. We used the mouse genome informatics (MGI) phenotype ontology, which  
512 contains manually curated knowledge about hierarchical structure of phenotypes and genotype-  
513 phenotype mapping of mouse<sup>32</sup>. We downloaded their ontologies on 2017-09-28 and mapped  
514 MGI gene identifiers to Ensembl human gene ID through unambiguous one-to-one homology  
515 mapping between human and mouse Ensembl IDs. We removed ontology terms that were  
516 labelled as “obsolete”, “bad”, or “unknown” from our analysis. As a result, we obtained 709,451  
517 mapping annotation spanning between 9,554 human genes and 9,592 mouse phenotypes.

518 For each DeGAs component, we selected the top 5,000 variants according to their  
519 variant contribution score and performed enrichment analysis with the default parameter as  
520 described elsewhere<sup>20</sup>. Since we included the non-coding variants in the analysis, we focused  
521 on GREAT binomial genomic region enrichment analysis based on the size of regulatory  
522 domain of genes, and quantified the significance of enrichment in terms of binomial fold  
523 enrichment and binomial p-value. Given that we have 9,561 terms in the ontology, we set a  
524 Bonferroni p-value threshold of  $5 \times 10^{-6}$ . To illustrate the results of the genomic region  
525 enrichment analysis for the phenotypes of our interest, we made circular bar plots using the R  
526 package ggplot2, where each of the key components are displayed in the innermost track with  
527 their phenotype squared cosine score to be proportional to their angle, and the resulted  
528 significant ontology terms are represented as the bars. The binomial fold change is represented  
529 as the radius and the binomial p-value is represented as color gradient in a log scale in the plot  
530 (Fig. 3b, Supplementary Fig. S7-8, Supplementary Table S5-7).

## 531 Quality control of variant calling with intensity plots

532 To investigate the quality of variant calling for the two PTVs highlighted in the study, we  
533 manually inspected intensity plots. These plots are available on Global Biobank Engine.

- 534 • <https://biobankengine.stanford.edu/intensity/rs114285050>
- 535 • <https://biobankengine.stanford.edu/intensity/rs150090666>

## 536 Phenome-wide association analysis

537 To explore the functional roles of the two PTVs across thousands of potentially correlated  
538 phenotypes, we performed a phenome-wide association study (PheWAS). We report the  
539 statistically significant ( $p < 0.001$ ) associations with phenotypes with at least 1,000 case count  
540 (binary phenotypes) or 1,000 individuals with measurements with non-missing values  
541 (quantitative phenotypes) (Fig. 3d, Supplementary Fig. S10). The results of this PheWAS are  
542 also available as interactive plots as a part of Global Biobank Engine.

- 543 • <https://biobankengine.stanford.edu/variant/5-145895394>
- 544 • <https://biobankengine.stanford.edu/variant/11-14865399>

## 545 Univariate regression analysis for the identified PTVs

546 To quantify the effects of the two PTVs on obesity, we performed univariate regression analysis.  
547 We extracted individual-level genotype information for the two PTVs with the PLINK2 pgen  
548 Python API (<http://www.cog-genomics.org/plink/2.0/>)<sup>48</sup>. After removing individuals with missing  
549 values for BMI and genotype, we performed linear regression for BMI  
550 (<http://biobank.ctsu.ox.ac.uk/crystal/field.cgi?id=21001>) with age, sex, and the first four genomic  
551 PCs as covariates:  
552 
$$\text{BMI} \sim 0 + \text{age} + \text{as.factor}(\text{sex}) + \text{PC1} + \text{PC2} + \text{PC3} + \text{PC4} + \text{as.factor}(\text{PTV})$$
  
553 where, PC1-4 denotes the first four components of genomic principal components, PTV ranges  
554 in 0, 1, or 2 and it indicates the number of minor alleles that the individuals have.

## 555 Mouse 3T3-L1 cell culture and differentiation

556 3T3-L1 preadipocytes were cultured in Dulbecco's Modified Eagle's Medium (DMEM) containing  
557 10% fetal bovine serum (FBS) and antibiotics (100 U/mL of penicillin G and 100 µg/mL of  
558 streptomycin) at 37°C in a humidified atmosphere containing 5% CO<sub>2</sub>. To obtain fully  
559 differentiated adipocytes, 3T3-L1 preadipocytes were grown into 2-day post-confluence, and  
560 then differentiation was induced by using a standard differentiation cocktail containing 0.5 mM of  
561 IBMX, 1 µM of dexamethasone, 1 µg/mL of insulin, and 10% FBS. After 48 h, medium was  
562 changed into DMEM supplemented with 10% FBS and 1 µg/mL of insulin and replenished every  
563 48 h for an additional 6 days.

## 564 Human SGBS cell culture and differentiation

565 SGBS cells were cultured in DMEM/F12 containing 33 µM biotin, 17 µM pantothenate,  
566 0.1 mg/mg streptomycin and 100 U/mL penicillin (0F medium) supplemented with 10% FBS in a  
567 5% CO<sub>2</sub> incubator. To initiate differentiation, confluent cells were stimulated by 0F media  
568 supplemented with 0.01 mg/mL human transferrin, 0.2 nM T3, 100 nM cortisol, 20 nM insulin,  
569 250 µM IBMX, 25 nM dexamethasone and 2 µM rosiglitazone. After day 4, the differentiating  
570 cells were kept in 0F media supplemented with 0.01 mg/mL human transferrin, 100 nM cortisol,  
571 20 nM insulin and 0.2 nM T3 for additional 8-10 days until cells were fully differentiated.

## 572 siRNA knockdown in 3T3-L1 preadipocytes

573 At 80% confluence, 3T3-L1 preadipocytes were transfected with 50 nM siRNA against  
574 *Gpr151* (Origene #SR412988), *Pde3b* (Origene #SR422062), or scrambled negative control  
575 (Origene #SR30004) using Lipofectamine™ RNAiMAX Transfection Reagent (Invitrogen)  
576 following the manufacturer's protocol. The transfected cells were incubated for 48 h and then  
577 subjected to differentiation.

## 578 Reverse transcription (RT) and qPCR analysis

579 Total RNA was extracted using TRIzol reagent (Invitrogen), following the manufacturer's  
580 instruction. RNA was converted to cDNA using High-Capacity cDNA Reverse Transcription Kit  
581 (Applied Biosystems). Quantitative PCR reactions were prepared with TaqMan™ Fast  
582 Advanced Master Mix (Thermo Fisher Scientific) and performed on ViiA 7 Real-Time PCR  
583 System (Thermo Fisher Scientific). All data were normalized to the content of Cyclophilin A  
584 (PPIA), as the endogenous control. TaqMan primer information for RT-qPCR is listed below:  
585 *GPR151* (Hs00972208\_s1), *Gpr151* (Mm00808987\_s1), *PDE3B* (Hs00265322\_m1), *Pde3b*  
586 (Mm00691635\_m1), *Pparg* (Mm00440940\_m1), *Cebpa* (Mm00514283\_s1), *Fabp4*  
587 (Mm00445878\_m1), *PPIA* (Hs04194521\_s1), *Ppia* (Mm02342430\_g1).

## 588 Oil Red O staining and quantification

589 Cells were washed twice with PBS and fixed with 10% formalin for 1 h at room temperature.  
590 Cells were then washed with 60% isopropanol and stained for 15 min with a filtered Oil Red O  
591 solution (mix six parts of 0.35% Oil Red O in isopropanol with four parts of water). After washing  
592 with PBS 4 times, cells were maintained in PBS and visualized by inverted microscope. After  
593 taking pictures, Oil Red O stain was extracted with 100% isopropanol and the absorbance was  
594 measured at 492 nm by a multi-well spectrophotometer (Bio-Rad).

## 595 Lipolysis assay

596 Glycerol release into the culture medium was used as an index of lipolysis. Fully differentiated  
597 3T3-L1 adipocytes were serum starved overnight and then treated with either vehicle (DMSO)  
598 or the lipolytic stimuli isoproterenol (ISO, 10 $\mu$ M) for 3 h. The culture medium was collected and  
599 the glycerol content in the culture medium was measured using an adipocyte lipolysis assay kit  
600 (ZenBio #LIP-1-NCL1). Glycerol release into the culture medium was normalized to the protein  
601 content of the cells from the same plate.

## 602 Overexpression of *GPR151* in 3T3-L1 preadipocytes

603 The *GPR151* construct was obtained from Addgene (#66327). This construct includes a  
604 cleavable HA signal to promote membrane localization, a FLAG epitope sequence for cell  
605 surface staining followed by codon-optimized human *GPR151* sequence<sup>53</sup>. We PCR-amplified  
606 the above sequence with stop codon and assembled it into a lentiviral plasmid (Addgene  
607 #85969) with either EF1 $\alpha$  promoter (Addgene # 11154) or aP2 promoter (Addgene # 11424).  
608 EF1 $\alpha$ -*GPR151* or aP2-*GPR151* lentiviral plasmid were transfected into human embryonic  
609 kidney 293T cells, together with the viral packaging vectors pCMV-dR8.91 and pMD2-G. 72 h  
610 after transfection, virus-containing medium was collected, filtered through a 0.45- $\mu$ m pore-size  
611 syringe filter, and frozen at -80°C. 3T3-L1 preadipocytes at 50% confluence were infected with  
612 the lentivirus stocks containing 8  $\mu$ g/mL polybrene. Two days after transduction, lentivirus-  
613 infected 3T3-L1 preadipocytes were subject to differentiation.



## 614 Flow cytometry analysis

615 Day 6 differentiating 3T3-L1 adipocytes were collected and washed with ice cold FACS buffer  
616 (PBS containing 2% BSA). Cells were first resuspended into FACS staining buffer (BioLegend #  
617 420201) at ~1M cells/100 $\mu$ l and incubated with anti-mouse CD16/CD32 Fc Block (BioLegend #  
618 101319) at room temperature for 10-15 min. Cells were then incubated with APC-conjugated  
619 FLAG antibody (BioLegend # 637307) for 20-30 min at room temperature in the dark. Following  
620 washing and centrifugation, cells were resuspended in FACS buffer and sorted using a BD  
621 Influx<sup>TM</sup> Cell Sorter. Cells without FLAG antibody staining were used to determine background  
622 fluorescence levels. Cells were sorted based on APC fluorescence and collected directly into  
623 TRIzol reagent for RNA extraction.

## 624 Western Blot Analysis

625 Lysate aliquots containing 50 $\mu$ g of proteins were denatured, separated on a 4-10% SDS-  
626 polyacrylamide gel, and transferred to nitrocellulose membranes using a Trans-Blot<sup>®</sup> SD Semi-  
627 Dry Transfer Cell (Bio-Rad). Membranes were blocked in 5% non-fat milk and incubated  
628 overnight at 4 °C with primary antibodies: anti-GPR151 (LSBio # LS-B6760-50) or anti-beta-  
629 actin (Cell Signaling #3700). Subsequently, the membranes were incubated for 1 h at room  
630 temperature with IRDye<sup>®</sup> 800CW goat-anti-mouse antibody (LI-COR #926-32210). Target  
631 proteins were visualized using Odyssey<sup>®</sup> Fc Imaging System (LI-COR).

## 632 Statistical analysis of functional data

633 Data are expressed as mean  $\pm$  SEM. Student's t test was used for single variables, and one-  
634 way ANOVA with Bonferroni post hoc correction was used for multiple comparisons using  
635 GraphPad Prism 7 software.

## 636 Acknowledgements

637 This research has been conducted using the UK Biobank Resource under Application Number  
638 24983. We thank all the participants in the UK Biobank study. Y.T. is supported by Funai  
639 Overseas Scholarship from Funai Foundation for Information Technology and the Stanford  
640 University School of Medicine. J.M.J. was funded by grant NNF17OC0025806 from the Novo  
641 Nordisk Foundation and the Stanford Bio-X Program. M.A.R. and C.D. are supported by  
642 Stanford University and a National Institute of Health center for Multi- and Trans-ethnic Mapping  
643 of Mendelian and Complex Diseases grant (5U01 HG009080). C.D. is supported by a  
644 postdoctoral fellowship from the Stanford Center for Computational, Evolutionary, and Human  
645 Genomics and the Stanford ChEM-H Institute. The primary and processed data used to  
646 generate the analyses presented here are available in the UK Biobank access management  
647 system (<https://amsportal.ukbiobank.ac.uk/>) for application 24983, "Generating effective  
648 therapeutic hypotheses from genomic and hospital linkage data"  
649 (<http://www.ukbiobank.ac.uk/wp-content/uploads/2017/06/24983-Dr-Manuel-Rivas.pdf>), and the

650 results are displayed in the Global Biobank Engine (<https://biobankengine.stanford.edu>). We  
651 obtained clip-arts for Fig. 1b from Irasutoya (<https://www.irasutoya.com/>) by following their terms  
652 and conditions. The copyright of the original clip-arts belongs to Mr. Takashi Mifune. We would  
653 like to thank the Customer Solutions Team from Paradigm4 who helped us implement efficient  
654 databases for queries and application of inference methods to the data, and also implemented  
655 optimized versions of truncated singular value decomposition.

656

#### 657 **Funding:**

658 This work was supported by National Human Genome Research Institute (NHGRI) and National  
659 Institute of Diabetes and Digestive and Kidney Diseases (NIDDK) of the National Institutes of  
660 Health (NIH) under awards R01HG010140 and R01DK106236. The content is solely the  
661 responsibility of the authors and does not necessarily represent the official views of the National  
662 Institutes of Health.

## 663 Author information

### 664 **Author contributions**

665 M.A.R. and E.I. conceived and designed the study. Y.T. and M.A.R. carried out the statistical  
666 and computational analyses with advice from J.M.J., H.H., M.A., C.D., B.N., K.L., T.H., G.B., and  
667 E.I. J.L., C.Y.P., and E.I. carried out the functional experiments. Y.T., M.A., and C.D. carried out  
668 quality control of the data. C.C. optimized and implemented computational methods. Y.T. and  
669 M.A.R. developed the DeGAs app in Global Biobank Engine. M.A.R. supervised computational  
670 and statistical aspects of the study. E.I. supervised experimental aspects of the study. The  
671 manuscript was written by Y.T., J.L., J.M.J., E.I., and M.A.R.; and revised by all the co-authors.  
672 All co-authors have approved of the final version of the manuscript.

673

### 674 **Competing financial interests**

675 None.

676

### 677 **Data availability:**

678 Data is displayed in the Global Biobank Engine (<https://biobankengine.stanford.edu>).

## 679 References

- 680 1. Welter, D. *et al.* The NHGRI GWAS Catalog, a curated resource of SNP-trait associations.  
681 *Nucleic Acids Res.* **42**, 1001–1006 (2014).
- 682 2. Visscher, P. M. *et al.* 10 Years of GWAS Discovery: Biology, Function, and Translation. *Am.*  
683 *J. Hum. Genet.* **101**, 5–22 (2017).

- 684 3. The International Schizophrenia Consortium. Common polygenic variation contributes to risk  
685 of schizophrenia and bipolar disorder. *Nature* **460**, 748–752 (2009).
- 686 4. Purcell, S. M. *et al.* A polygenic burden of rare disruptive mutations in schizophrenia. *Nature*  
687 **506**, 185–190 (2014).
- 688 5. Boyle, E. A., Li, Y. I. & Pritchard, J. K. An Expanded View of Complex Traits: From  
689 Polygenic to Omnigenic. *Cell* **169**, 1177–1186 (2017).
- 690 6. Plenge, R. M., Scolnick, E. M. & Altshuler, D. Validating therapeutic targets through human  
691 genetics. *Nat. Rev. Drug Discov.* **12**, 581–594 (2013).
- 692 7. Waring, R. Sequence Variations in PCSK9, Low LDL, and Protection against Coronary  
693 Heart Disease. *N Engl J Med* **9** (2006).
- 694 8. Cohen, J. *et al.* Low LDL cholesterol in individuals of African descent resulting from frequent  
695 nonsense mutations in PCSK9. *Nat. Genet.* **37**, 161–165 (2005).
- 696 9. Rivas, M. A. *et al.* Deep resequencing of GWAS loci identifies independent rare variants  
697 associated with inflammatory bowel disease. *Nat. Genet.* **43**, 1066–1073 (2011).
- 698 10. Rivas, M. A. *et al.* A protein-truncating R179X variant in RNF186 confers protection against  
699 ulcerative colitis. *Nat. Commun.* **7**, 12342 (2016).
- 700 11. Nejentsev, S., Walker, N., Riches, D., Egholm, M. & Todd, J. A. Rare Variants of IFIH1, a  
701 Gene Implicated in Antiviral Responses, Protect Against Type 1 Diabetes. *Science* **324**,  
702 387–389 (2009).
- 703 12. DeBoever, C. *et al.* Medical relevance of protein-truncating variants across 337,205  
704 individuals in the UK Biobank study. *Nat. Commun.* **9**, 1612 (2018).
- 705 13. Tipney, H. *et al.* The support of human genetic evidence for approved drug indications. *Nat.*  
706 *Genet.* **47**, 1–7 (2015).
- 707 14. Bycroft, C. *et al.* The UK Biobank resource with deep phenotyping and genomic data.  
708 *Nature* **562**, 203–209 (2018).

- 709 15. Stewart, G. On the Early History of the Singular Value Decomposition. *SIAM Rev.* **35**, 551–  
710 566 (1993).
- 711 16. Novembre, J. *et al.* Genes mirror geography within Europe. *Nature* **456**, 98–101 (2008).
- 712 17. Varah, J. M. On the Numerical Solution of Ill-Conditioned Linear Systems with Applications  
713 to Ill-Posed Problems. *SIAM J. Numer. Anal.* **10**, 257–267 (1973).
- 714 18. Hanson, R. J. A Numerical Method for Solving Fredholm Integral Equations of the First Kind  
715 Using Singular Values. *SIAM J. Numer. Anal.* **8**, 616–622 (1971).
- 716 19. Hansen, P. C. The truncatedSVD as a method for regularization. *BIT Numer. Math.* **27**,  
717 534–553 (1987).
- 718 20. McLean, C. Y. *et al.* GREAT improves functional interpretation of cis-regulatory regions.  
719 *Nat. Biotechnol.* **28**, 495–501 (2010).
- 720 21. Rivas, M. A. *et al.* Effect of predicted protein-truncating genetic variants on the human  
721 transcriptome. *Science* **348**, 666–669 (2015).
- 722 22. MacArthur, D. G. *et al.* A Systematic Survey of Loss-of-Function Variants in Human Protein-  
723 Coding Genes. *Science* **335**, 823–828 (2012).
- 724 23. Abdi, H. & Williams, L. J. Principal component analysis. *Wiley Interdiscip. Rev. Comput.*  
725 *Stat.* **2**, 433–459 (2010).
- 726 24. Bigaard, J. *et al.* Body Fat and Fat-Free Mass and All-Cause Mortality. *Obes. Res.* **12**,  
727 1042–1049 (2004).
- 728 25. Foster, K. R. & Lukaski, H. C. Whole-body impedance--what does it measure? *Am. J. Clin.*  
729 *Nutr.* **64**, 388S-396S (1996).
- 730 26. Talma, H. *et al.* Bioelectrical impedance analysis to estimate body composition in children  
731 and adolescents: a systematic review and evidence appraisal of validity, responsiveness,  
732 reliability and measurement error. *Obes. Rev. Off. J. Int. Assoc. Study Obes.* **14**, 895–905  
733 (2013).

- 734 27. Moran, A. E. *et al.* The Global Burden of Ischemic Heart Disease in 1990 and 2010.  
735 *Circulation* (2014).
- 736 28. Lammert, F. *et al.* Gallstones. *Nat. Rev. Dis. Primer* **2**, 16024 (2016).
- 737 29. Zhou, D., Wu, J. & Luo, G. Body mass index and risk of non-melanoma skin cancer:  
738 cumulative evidence from prospective studies. *Sci. Rep.* **6**, 37691 (2016).
- 739 30. Khera, A. V. & Kathiresan, S. Is Coronary Atherosclerosis One Disease or Many?: Setting  
740 Realistic Expectations for Precision Medicine. *Circulation* **135**, 1005–1007 (2017).
- 741 31. Bennion, L. J. & Grundy, S. M. Risk Factors for the Development of Cholelithiasis in Man. *N.*  
742 *Engl. J. Med.* **299**, 1161–1167 (1978).
- 743 32. Smith, C. L. & Eppig, J. T. Expanding the mammalian phenotype ontology to support  
744 automated exchange of high throughput mouse phenotyping data generated by large-scale  
745 mouse knockout screens. *J. Biomed. Semant.* **6**, 11 (2015).
- 746 33. Krawczyk, M. *et al.* Phytosterol and cholesterol precursor levels indicate increased  
747 cholesterol excretion and biosynthesis in gallstone disease. *Hepatology* **55**, 1507–1517  
748 (2012).
- 749 34. Abul-Husn, N. S. *et al.* A Protein-Truncating HSD17B13 Variant and Protection from Chronic  
750 Liver Disease. *N. Engl. J. Med.* **378**, 1096–1106 (2018).
- 751 35. Green, H. & Kehinde, O. An established preadipose cell line and its differentiation in culture  
752 II. Factors affecting the adipose conversion. *Cell* **5**, 19–27 (1975).
- 753 36. Wabitsch, M. *et al.* Characterization of a human preadipocyte cell strain with high capacity  
754 for adipose differentiation. *Int. J. Obes.* **25**, 8–15 (2001).
- 755 37. Broms, J. *et al.* Monosynaptic retrograde tracing of neurons expressing the G-protein  
756 coupled receptor Gpr151 in the mouse brain. *J. Comp. Neurol.* **525**, 3227–3250 (2017).
- 757 38. Shakur, Y. *et al.* Regulation and function of the cyclic nucleotide phosphodiesterase (PDE3)  
758 gene family. in *Progress in Nucleic Acid Research and Molecular Biology* **66**, 241–277  
759 (Elsevier, 2000).

- 760 39. Chung, Y. W. *et al.* White to beige conversion in PDE3B KO adipose tissue through  
761 activation of AMPK signaling and mitochondrial function. *Sci. Rep.* **7**, 40445 (2017).
- 762 40. Chung, Y. W. *et al.* Targeted disruption of PDE3B, but not PDE3A, protects murine heart  
763 from ischemia/reperfusion injury. *Proc. Natl. Acad. Sci.* 201416230 (2015).  
764 doi:10.1073/pnas.1416230112
- 765 41. Emdin, C. A. *et al.* Genetic Association of Waist-to-Hip Ratio With Cardiometabolic Traits,  
766 Type 2 Diabetes, and Coronary Heart Disease. *JAMA* **317**, 626–634 (2017).
- 767 42. Collins, F. S. & Varmus, H. A New Initiative on Precision Medicine. *N. Engl. J. Med.* **372**,  
768 793–795 (2015).
- 769 43. Chen, Z. *et al.* China Kadoorie Biobank of 0.5 million people: survey methods, baseline  
770 characteristics and long-term follow-up. *Int. J. Epidemiol.* **40**, 1652–1666 (2011).
- 771 44. Christensen, H., Nielsen, J. S., Sorensen, K. M., Melbye & Brandslund, I. New national  
772 Biobank of The Danish Center for Strategic Research on Type 2 Diabetes (DD2). *Clin.*  
773 *Epidemiol.* **37** (2012). doi:10.2147/CLEP.S33042
- 774 45. Avlund, K. *et al.* Copenhagen Aging and Midlife Biobank (CAMB): An Introduction. *J. Aging*  
775 *Health* **26**, 5–20 (2014).
- 776 46. Emdin, C. A. *et al.* Analysis of predicted loss-of-function variants in UK Biobank identifies  
777 variants protective for disease. *Nat. Commun.* **9**, 1613 (2018).
- 778 47. McInnes, G. *et al.* Global Biobank Engine: enabling genotype-phenotype browsing for  
779 biobank summary statistics. *bioRxiv* 304188 (2018). doi:10.1101/304188
- 780 48. Chang, C. C. *et al.* Second-generation PLINK: rising to the challenge of larger and richer  
781 datasets. *GigaScience* **4**, 7 (2015).
- 782 49. Baglama, J. & Reichel, L. Augmented Implicitly Restarted Lanczos Bidiagonalization  
783 Methods. *SIAM J. Sci. Comput.* **27**, 19–42 (2005).

- 784 50. Brown, P. G. Overview of sciDB: large scale array storage, processing and analysis. in  
785 *Proceedings of the 2010 international conference on Management of data - SIGMOD '10*  
786 963 (ACM Press, 2010). doi:10.1145/1807167.1807271
- 787 51. Gower, J., Lubbe, S. & Roux, N. le. *Understanding Biplots*. (John Wiley & Sons, Ltd, 2011).  
788 doi:10.1002/9780470973196
- 789 52. Gabriel, K. R. The Biplot Graphic Display of Matrices with Application to Principal  
790 Component Analysis. *Biometrika* **58**, 453 (1971).
- 791 53. Kroeze, W. K. *et al.* PRESTO-Tango as an open-source resource for interrogation of the  
792 druggable human GPCRome. *Nat. Struct. Mol. Biol.* **22**, 362–369 (2015).  
793

794 **Figures**

795 **Figure 1**

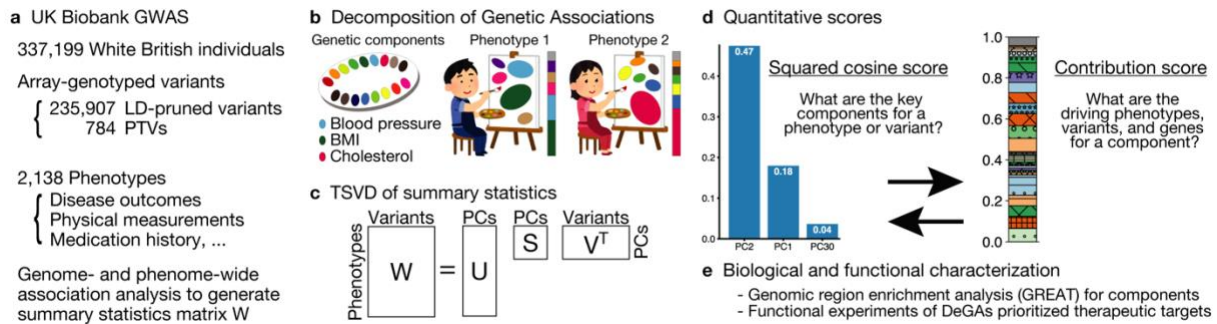

796  
 797  
 798  
 799  
 800  
 801  
 802  
 803  
 804  
 805  
 806  
 807  
 808  
 809

**Fig.1** Illustrative study overview. **a** Summary of the UK Biobank genotype and phenotype data used in the study. We included White British individuals and analyzed LD-pruned and quality-controlled variants in relation to 2,138 phenotypes with a minimum of 100 individuals as cases (binary phenotypes) or non-missing values (quantitative phenotypes) (Supplementary Table S1-2). **b** Decomposition of Genetic Associations (DeGAs) characterizes latent genetic components, which are represented as different colors on the palette, with an unsupervised learning approach – truncated singular value decomposition (TSVD), followed by identification of the key components for each phenotype of our interest (painting phenotypes with colors) and annotation of each of the components with driving phenotypes, variants, and genes (finding the meanings of colors). **c** TSVD applied to decompose genome- and phenome-wide summary statistic matrix  $W$  to characterize latent components.  $U$ ,  $S$ , and  $V$  represent resulting matrices of singular values and vectors. **d** We used the squared cosine score and the contribution score, to quantify compositions and biomedical relevance of latent components. **e** We applied the genomic region enrichment analysis tool (GREAT) for biological characterization of each component and performed functional experiments focusing on adipocyte biology.



## 810 Figure 2

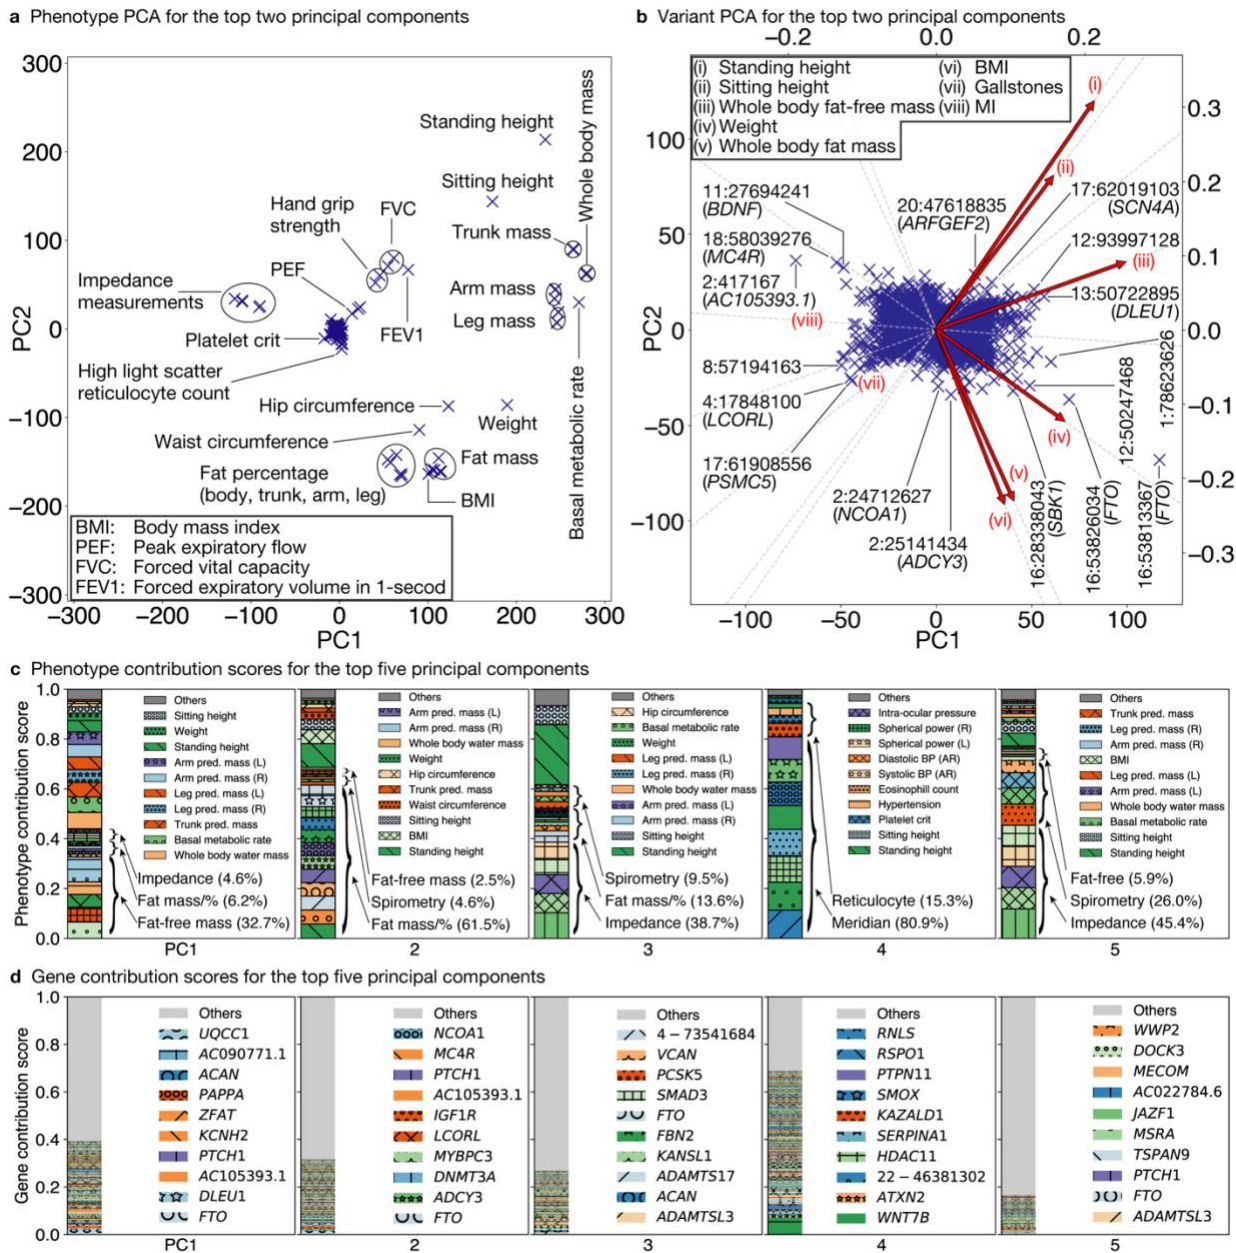

811  
812  
813  
814  
815  
816  
817  
818  
819  
820  
821  
822  
823  
824

**Fig. 2** Characterization of latent structures of genetic associations from genome- and-phenome-wide association summary statistics with DeGAs. **a-b** Components from truncated singular value decomposition (TSVD) corresponds to principal components in the phenotype (**a**) and variant (**b**) spaces. The first two components of all variants, excluding the MHC region, and relevant phenotypes are shown. **b** For variant PCA, we show biplot arrows (red) for selected phenotypes to help interpretation of the direction of principal components (Methods). The variants are labeled based on the genomic positions and the corresponding gene symbols. For example, "16:53813367 (*FTO*)" indicates the variant in gene *FTO* at position 53813367 on chromosome 16. **c-d** Phenotype (**c**) and gene (**d**) contribution scores for the first five components. PC1 is driven by largest part of the body mass that accounts for the "healthy part" (main text) including whole-body fat-free mass and genetic variants on *FTO* and *DLEU1*, whereas PC2 is driven by fat-related measurements, PC3 is driven by bioelectrical impedance measurements, PC4 is driven by eye measurements, and PC5 is driven by bioelectrical impedance and spirometry measurements along with the corresponding genetic variants (main text, Supplementary Table S3-4). Each colored segment represents a phenotype or gene with at least 0.5% and 0.05% of phenotype and gene contribution scores, respectively, and the rest is aggregated as others on the top of the stacked bar plots. The major

825 contributing phenotype groups (Methods, Supplementary Table S3) and additional top 10 phenotypes and the top 10 genes for each  
826 component are annotated in **c** and **d**, respectively. Abbreviations. pred.: predicted, %: percentage, mass/% mass and percentage,  
827 BP: blood pressure, AR: automated reading, L: left, R: right.

828 Figure 3

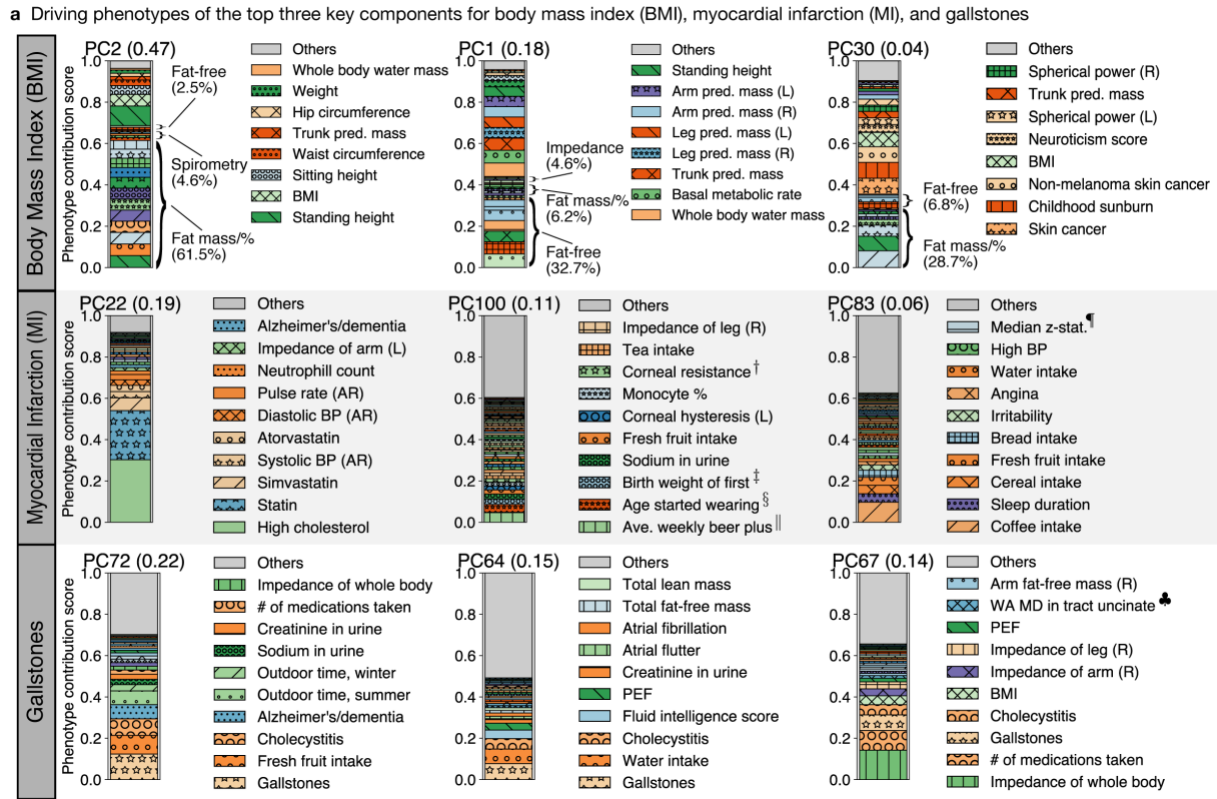

**b** Ontology enrichment analysis with the genomic region enrichment analysis tool (GREAT) for body mass index

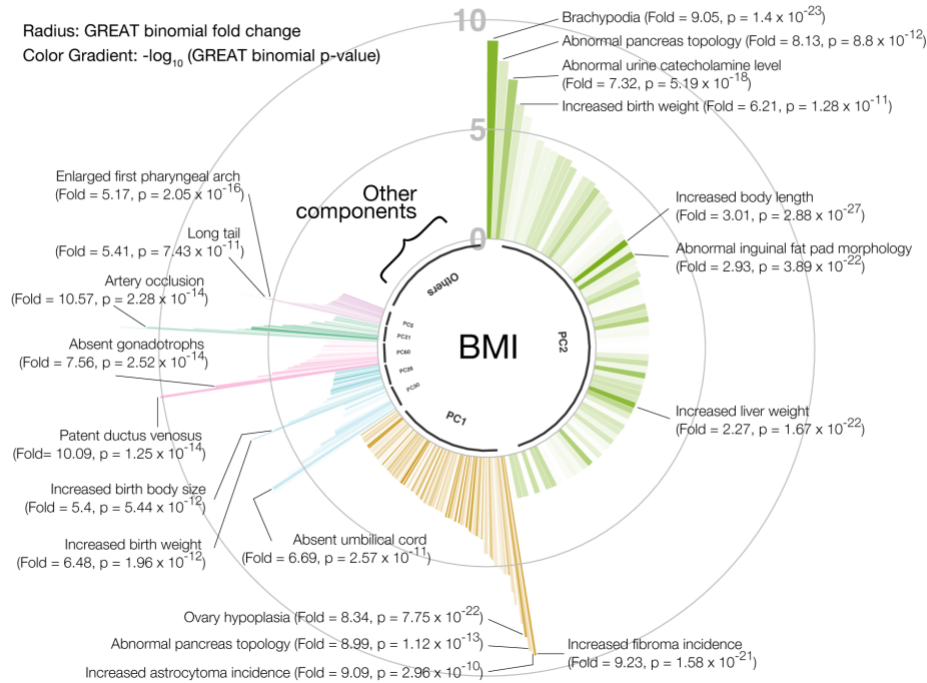

829  
830  
831  
832

**Fig.3** The top three key latent components from DeGAs of coding and non-coding variants for body mass index (BMI), myocardial infarction (MI), and gallstones. **a** The top three key components for each phenotype are identified by phenotype squared cosine scores and characterized with the driving phenotypes by phenotype contribution scores (Methods). Each colored segment

833 represents a phenotype with at least 0.5% of phenotype contribution scores for each of the component and the rest of the  
834 phenotypes are aggregated as others and shown as the gray bar on the top. For BMI, additional phenotype grouping is applied  
835 (Methods, Supplementary Table S3). **b** Biological characterization of driving non-coding and coding variants of the key components  
836 for BMI with GREAT. The key components are shown proportional to their squared cosine score along with significantly enriched  
837 terms in mouse MGI phenotype ontology. The radius represents binomial fold change and the color gradient represents p-value  
838 from GREAT ontology enrichment analysis. Abbreviations. pred.: predicted, #: number, %: percentage, mass/% mass and  
839 percentage, BP: blood pressure, AR: automated reading, L: left, R: right, WA: weighted average. †: Corneal resistance factor (right),  
840 ‡: Birth weight of first child, §: Age started wearing glasses or contact lenses, ||: Average weekly beer plus cider intake, ¶: Median z-  
841 statistic (in group-defined mask) for shapes activation, ♣: Weighted-mean MD in tract uncinata fasciculus (right).

842 **Figure 4**

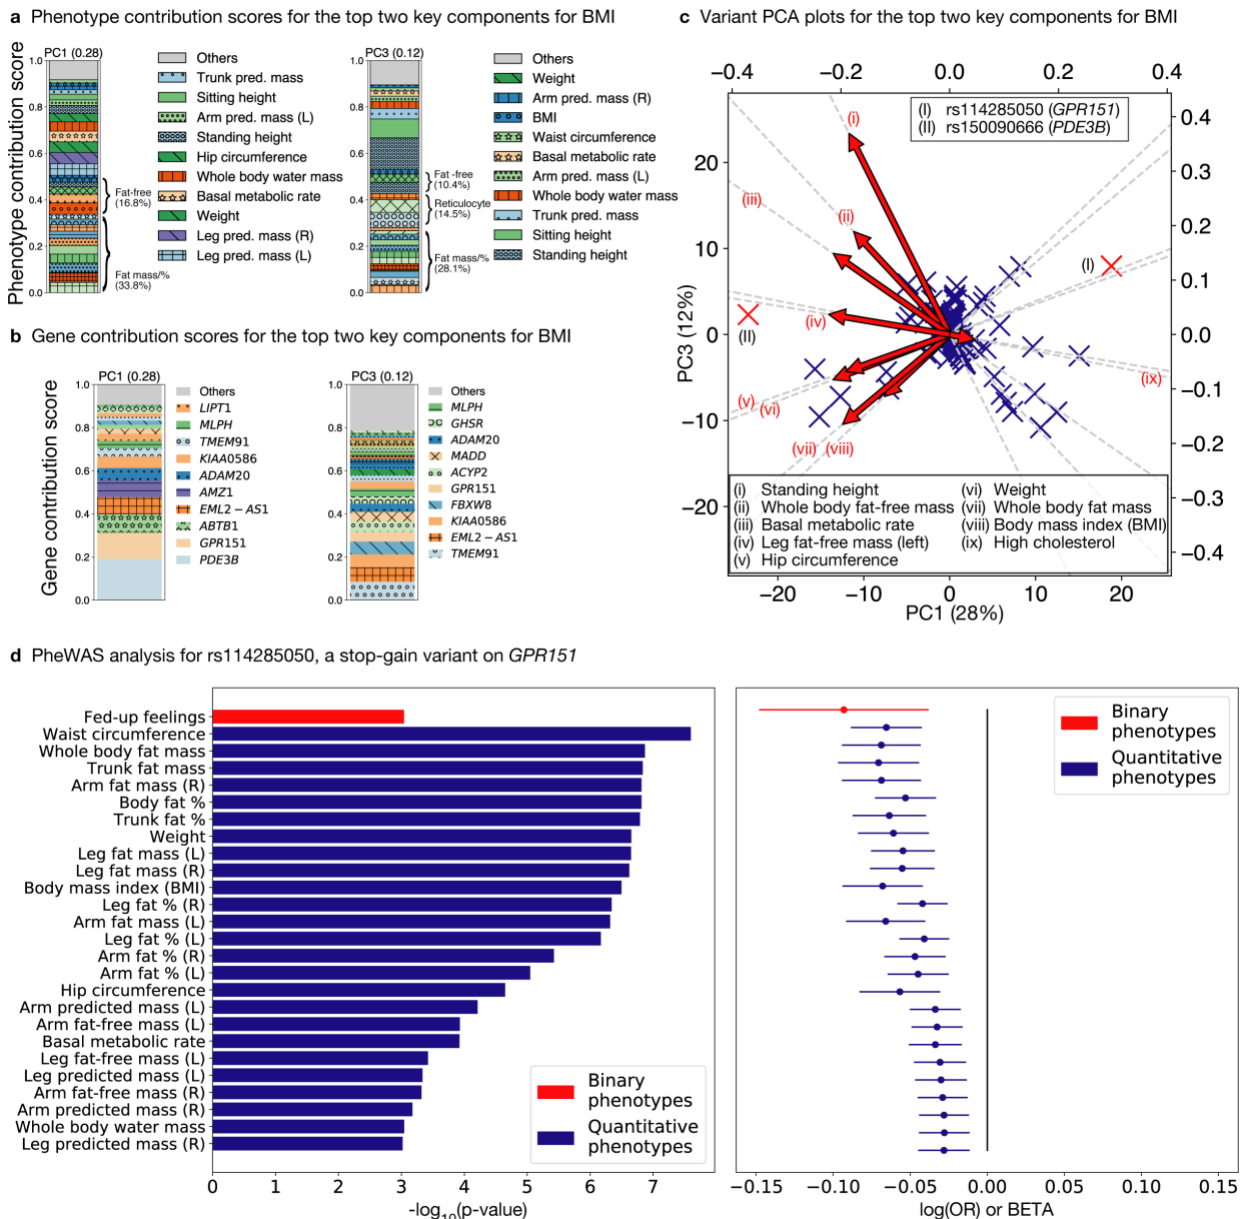

843 **Fig. 4** DeGAs applied to the protein-truncating variants (PTVs) dataset. **a-b** Phenotype (**a**) and gene (**b**) contribution scores for the  
 844 top key components associated with BMI based on phenotype grouping (Methods, Supplementary Table S3). **c** Variant PCA plot  
 845 with biplot annotations for the top two components (Methods). The identified targets for functional follow-up (main text) are marked  
 846 as (I) rs114285050 (a stop-gain variant on *GPR151*) and (II) rs150090666 (*PDE3B*). **d** Phenome-wide association analysis for  
 847 *GPR151* rs114285050. The p-values (left) and log odds ratio (OR) (binary phenotypes, shown as red) or beta (quantitative  
 848 phenotypes, shown as blue) (right) along with 95% confidence interval are shown for the phenotypes with minimum case count of  
 849 1,000 (binary phenotypes) or 1,000 individuals with non-missing values (quantitative phenotypes) and strong association ( $p < 0.001$ )  
 850 and with this variants among all the phenotypes used in the study. Abbreviations: L: left, R: right, %: percentage, pred: predicted.  
 851

852 Figure 5

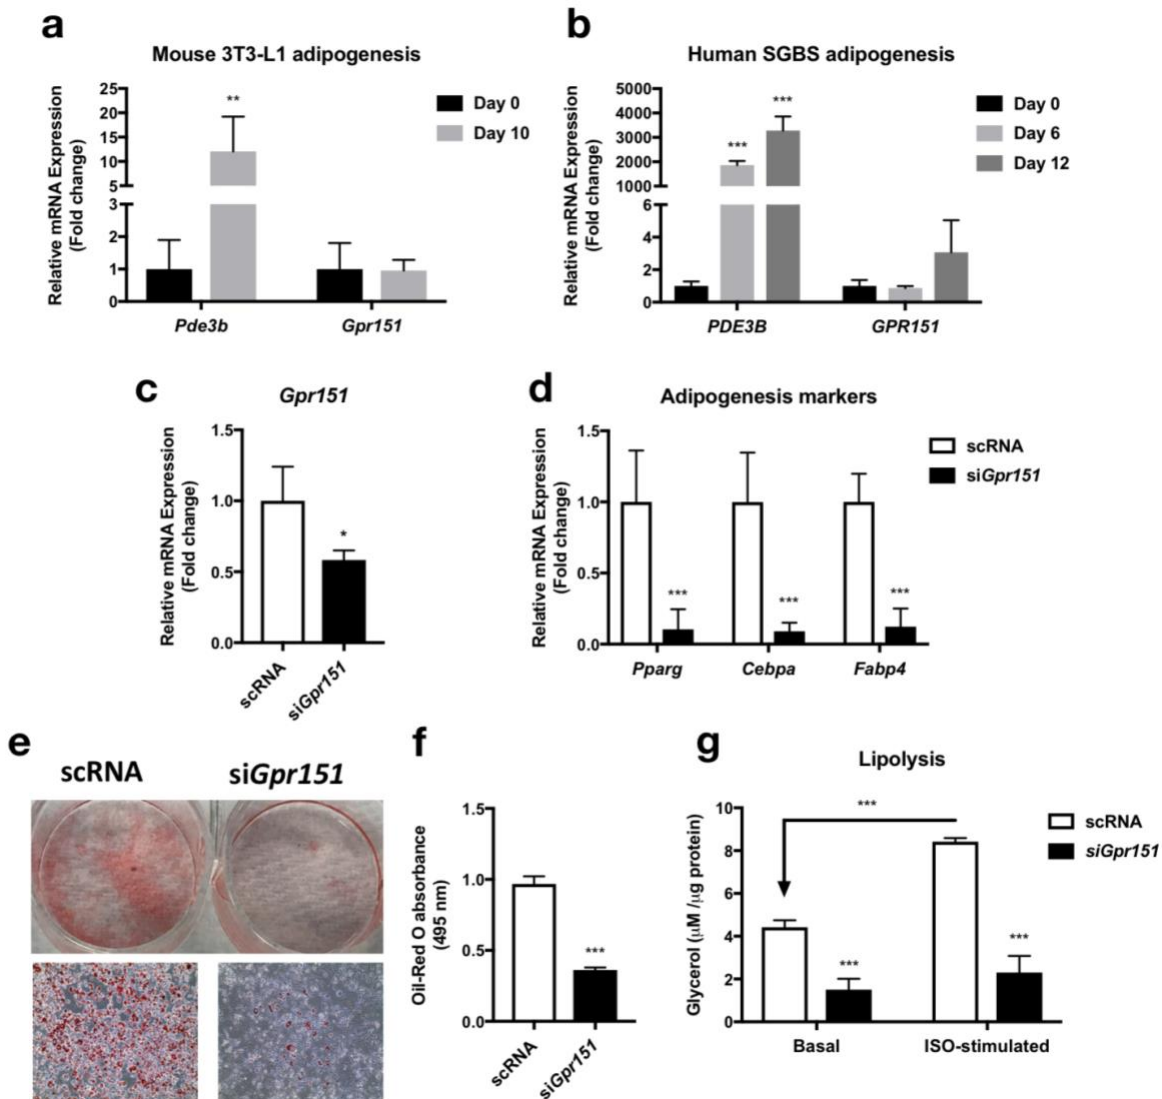

853  
854 **Fig. 5** Experimental validation of *GPR151* and *PDE3B* function in cellular models of adipogenesis. **a-b** qPCR analysis of gene  
855 expression patterns of *PDE3B* and *GPR151* during **(a)** mouse 3T3-L1 adipogenesis and **(b)** human SGBS adipogenesis. **c** qPCR  
856 analysis of *Gpr151* mRNA knockdown in 3T3-L1 preadipocytes. **d** qPCR analysis of the effect of siGpr151 knockdown on  
857 adipogenesis markers, *Pparg*, *Cebpa* and *Fabp4*. **e-g** Oil-Red O staining (**e**), quantification of lipid droplets (**f**), and lipolysis (**g**) in  
858 scRNA- or siGpr151-transfected adipocytes. Means  $\pm$  SEM are shown (\*\*p-value<0.01, \*\*\*p-value<0.001, \*p-value <0.05). scRNA:  
859 scrambled siRNA. ISO: isoproterenol.

## 860 Supplementary Materials

### 861 List of supplementary materials

- 862 ● Fig. S1: Variant filtering workflow
- 863 ● Fig. S2: Scree plot
- 864 ● Fig. S3: Squared cosine score (all variants dataset)
- 865 ● Fig. S4: Gene contribution score (all variants dataset)
- 866 ● Fig. S5: Variant PCA plot for MI
- 867 ● Fig. S6: Variant PCA plot for gallstones
- 868 ● Fig. S7: GREAT enrichment analysis for MI
- 869 ● Fig. S8: GREAT enrichment analysis for gallstones
- 870 ● Fig. S9: Squared cosine score of BMI (PTVs dataset)
- 871 ● Fig. S10: PheWAS analysis for *PDB3B*
- 872 ● Fig. S11: Univariate regression analysis for *GPR151*
- 873 ● Fig. S12: Univariate regression analysis for *PDE3B*
- 874 ● Fig. S13: *GPR151* overexpression
- 875 ● Fig. S14: Effects of *Pde3b* knockdown in 3T3-L1 adipogenesis
- 876 ● Table S1: List of phenotype categories
- 877 ● Table S2: List of phenotypes
- 878 ● Table S3: Phenotype groupings for visualization
- 879 ● Table S4: Summary of contribution scores for the key components
- 880 ● Table S5: GREAT enrichment analysis for BMI
- 881 ● Table S6: GREAT enrichment analysis for MI
- 882 ● Table S7: GREAT enrichment analysis for gallstones
- 883 ● Table S8: PheWAS analysis for rs114285050 (*GPR151*)
- 884 ● Table S9: PheWAS analysis for rs150090666 (*PDE3B*)

885 **Fig. S1: Variant filtering workflow**

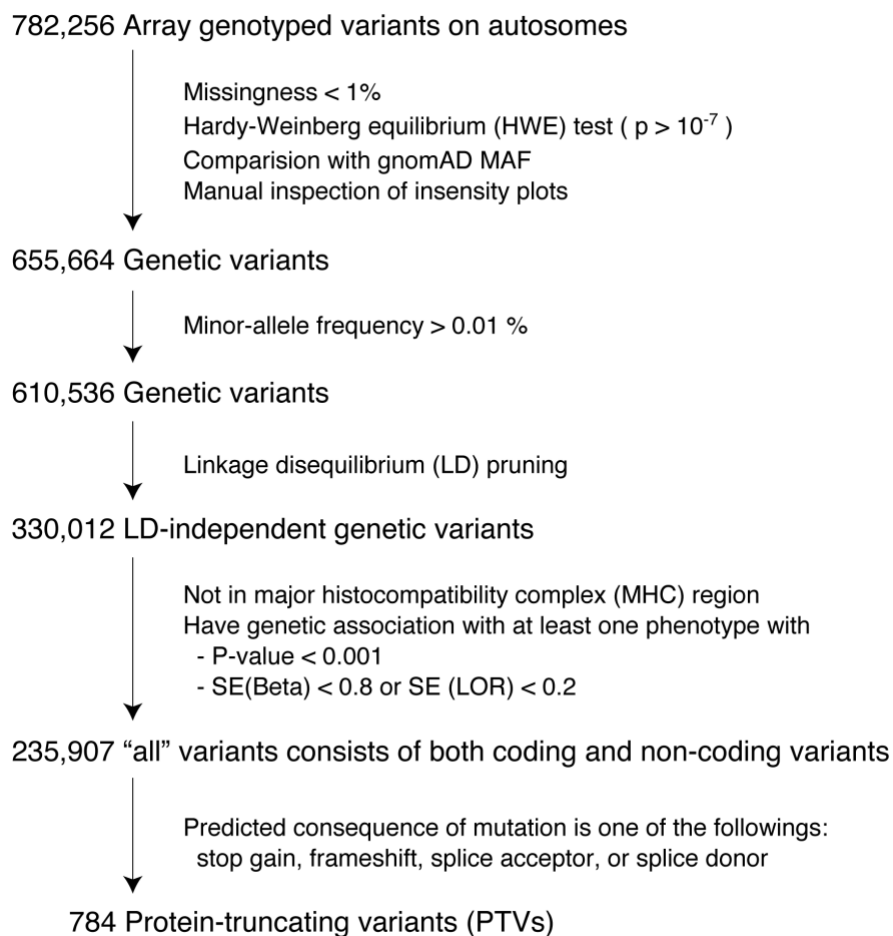

886  
887 **Fig. S1** Illustrative summary of the variant filters used in the study. The last two variant sets  
888 ("all" variants and PTVs) are used in the study. Abbreviations. SE: standard error. LOR: log  
889 odds ratio.



890 Fig. S2: Scree plot

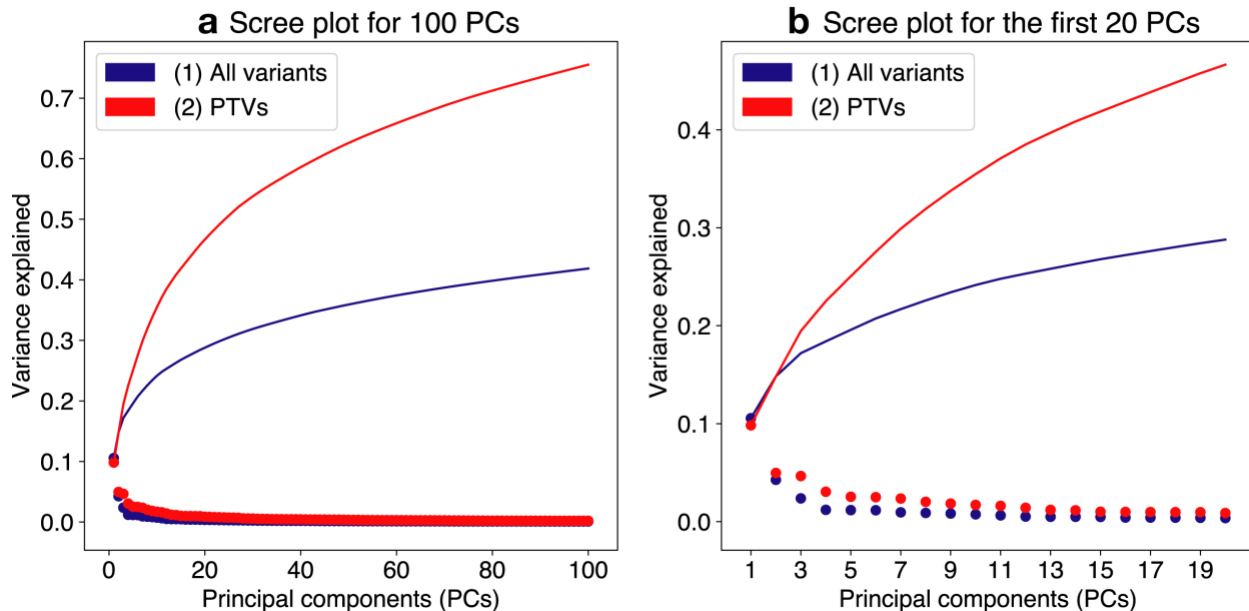

891  
892

893 **Fig. S2** Scree plot summarizes variance explained in each of the top 100 (a) and 20 (b)  
894 components. The scree plots are shown for two datasets consists of LD-pruned and QC-filtered  
895 sets of array-genotyped variants outside of MHC region: (1) all array-genotyped variants, which  
896 includes coding and non-coding variants (blue) and (2) protein-truncating variants (PTVs, red).  
897 For each component, we calculate the variance explained defined as squared eigenvalues  
898 divided by the total variance in the original matrix (Methods). We plotted those values  
899 and cumulative values as lines.

900 Fig. S3: Squared cosine score (all variants dataset)

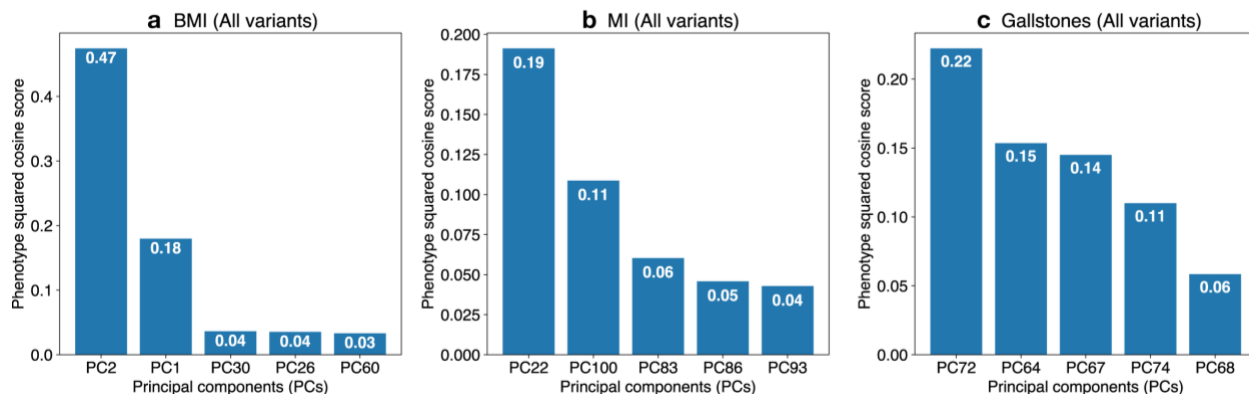

901  
902

903 **Fig. S3** Identification of the key components with phenotype squared cosine scores. Squared  
904 cosine score quantifies relative importance of the key components for a given phenotype. The  
905 top five key components are identified for all variant dataset that includes both coding and non-  
906 coding variants for three phenotypes: **a** body mass index (BMI), **b** myocardial infarction (MI),  
907 and **c** gallstones. The top five key components are shown on the horizontal axis and the  
908 corresponding squared cosine scores are shown on the vertical axis.

909 Fig. S4: Gene contribution score (all variants dataset)

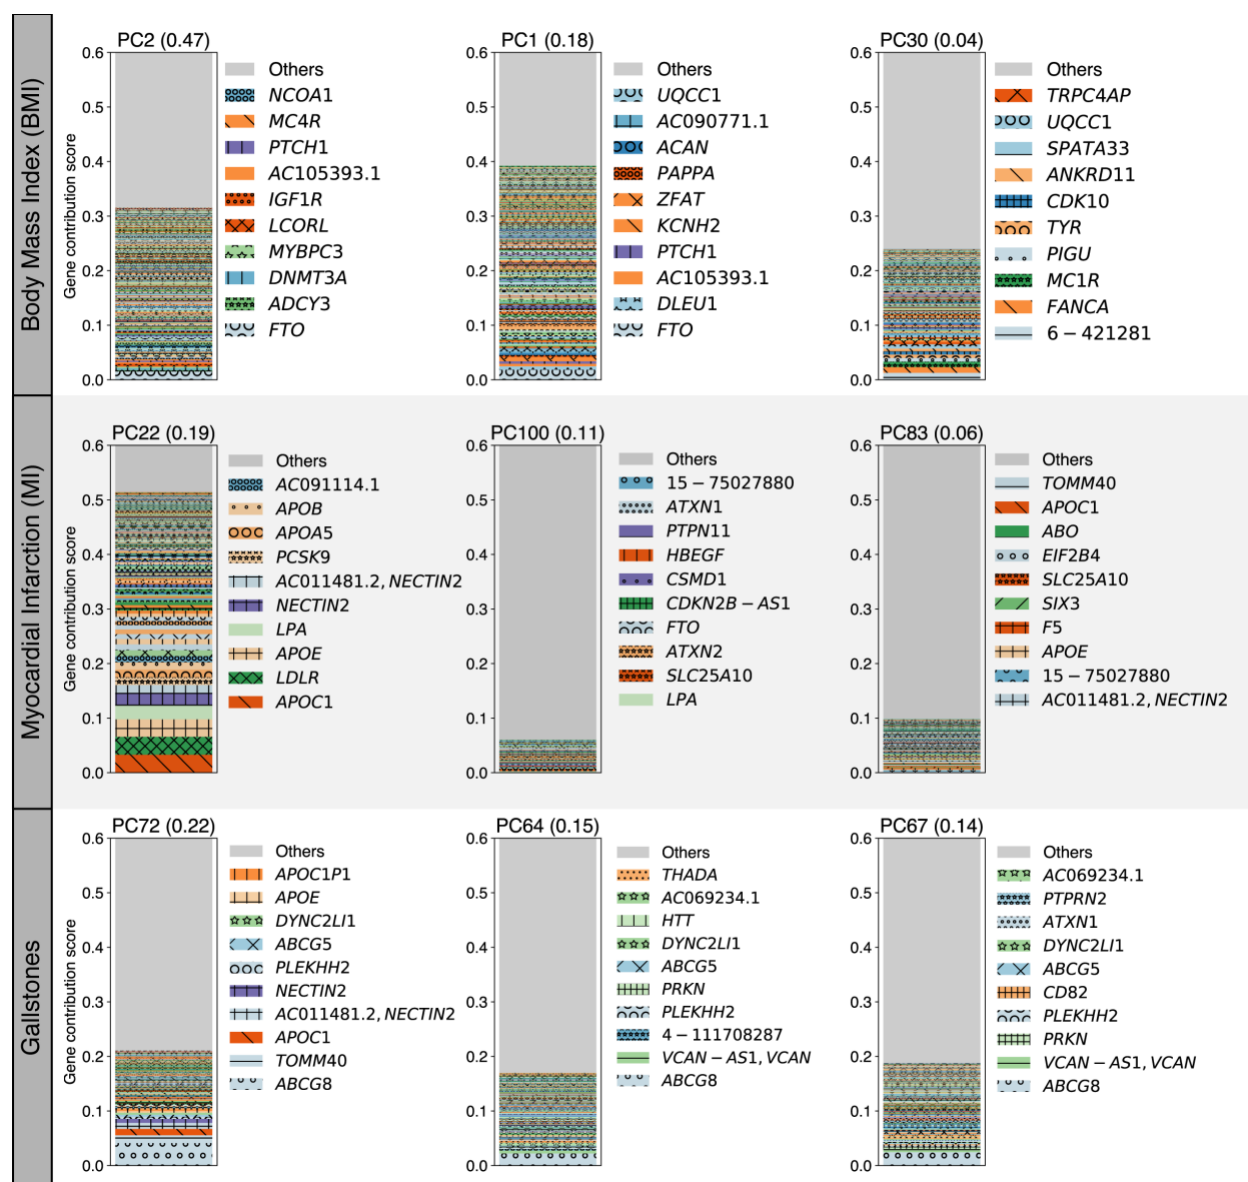

910  
 911  
 912 **Fig. S4** Gene contribution scores for the top three key components for body mass index (BMI),  
 913 myocardial infarction (MI), and gallstones using all variant dataset, which includes both coding  
 914 and non-coding variants. For each phenotype, the top three key components with their  
 915 phenotype squared cosine scores are shown on the top of the stacked bar plot and gene  
 916 contribution scores for each of the components are shown as colored segments. Each colored  
 917 segment represents a gene with at least 0.05% of contribution scores and the rest of the genes  
 918 are aggregated as the gray bar at the top. For the visualization, the maximum value of the  
 919 vertical axis is set to be 0.6. For each component, the labels for the top 10 driving genes are  
 920 shown. For non-coding variants, we display their genomic coordinates.

921 Fig. S5: Variant PCA plot for myocardial infarction.

922

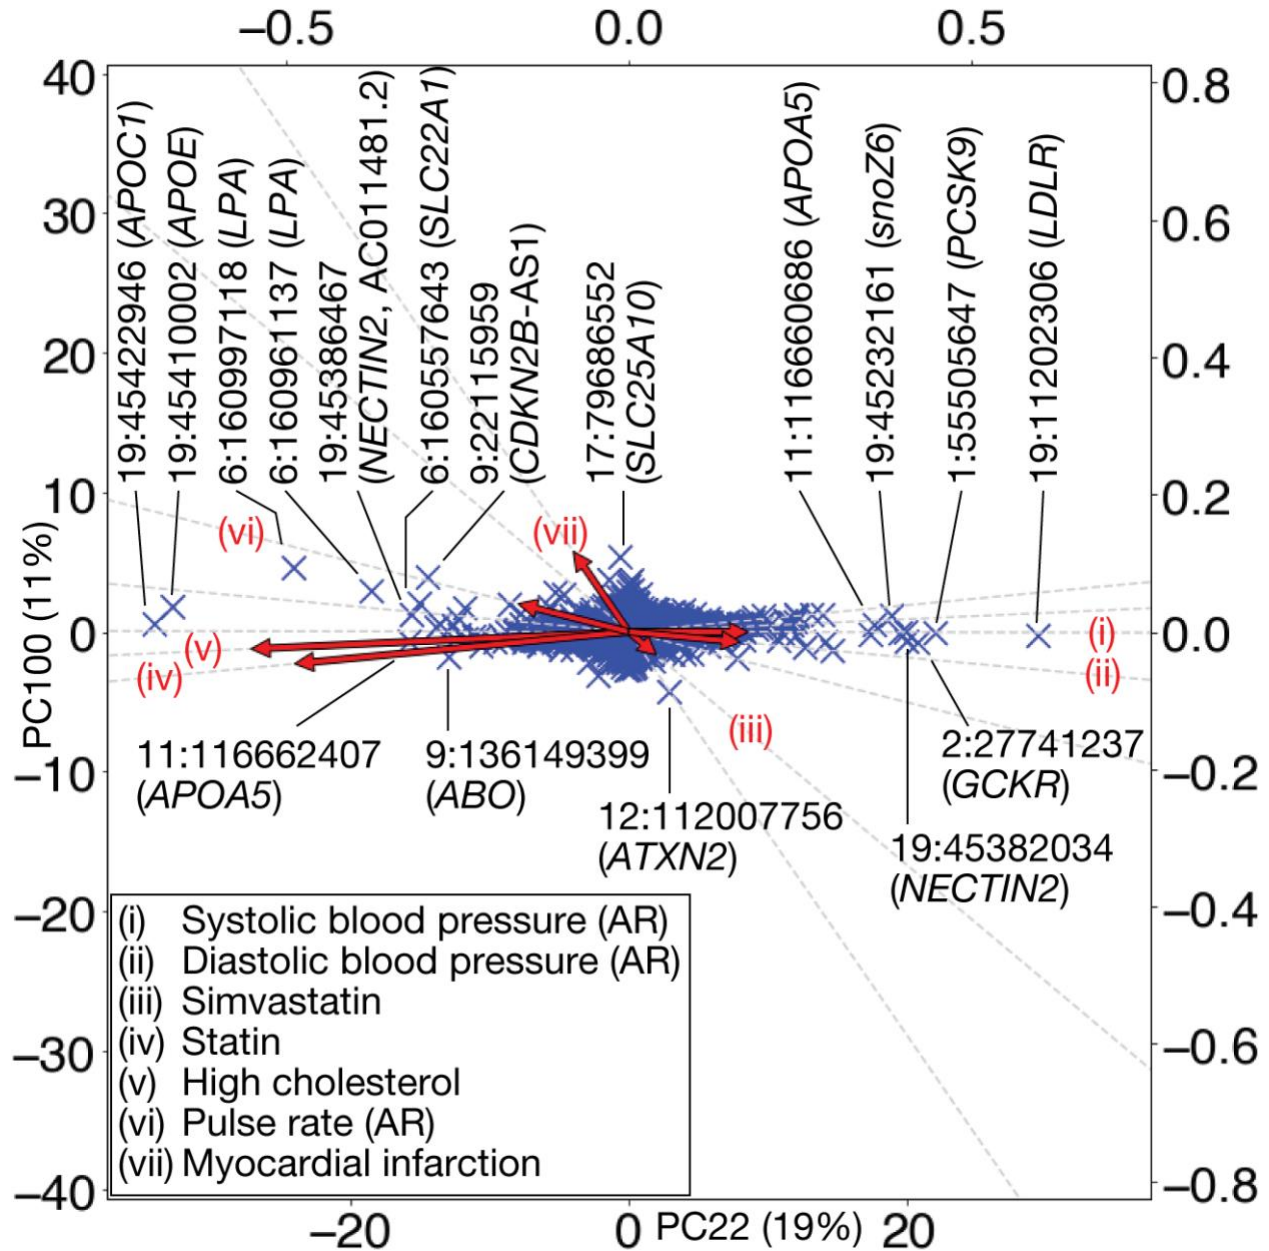

923

924 **Fig. S5** Variant PCA plot with biplot annotation for the top two key components for myocardial  
 925 infarction using “all” dataset. Genetic variants projected into the top two key components, PC22  
 926 (horizontal axis) and PC100 (vertical axis) are shown as scatter plot. Variants are annotated  
 927 with gene symbols. Directions of genetic associations for relevant phenotypes are annotated as  
 928 red arrows using the secondary axes (Methods). Abbreviations. AR: automated reading.

929 Fig. S6: Variant PCA plot for Gallstones

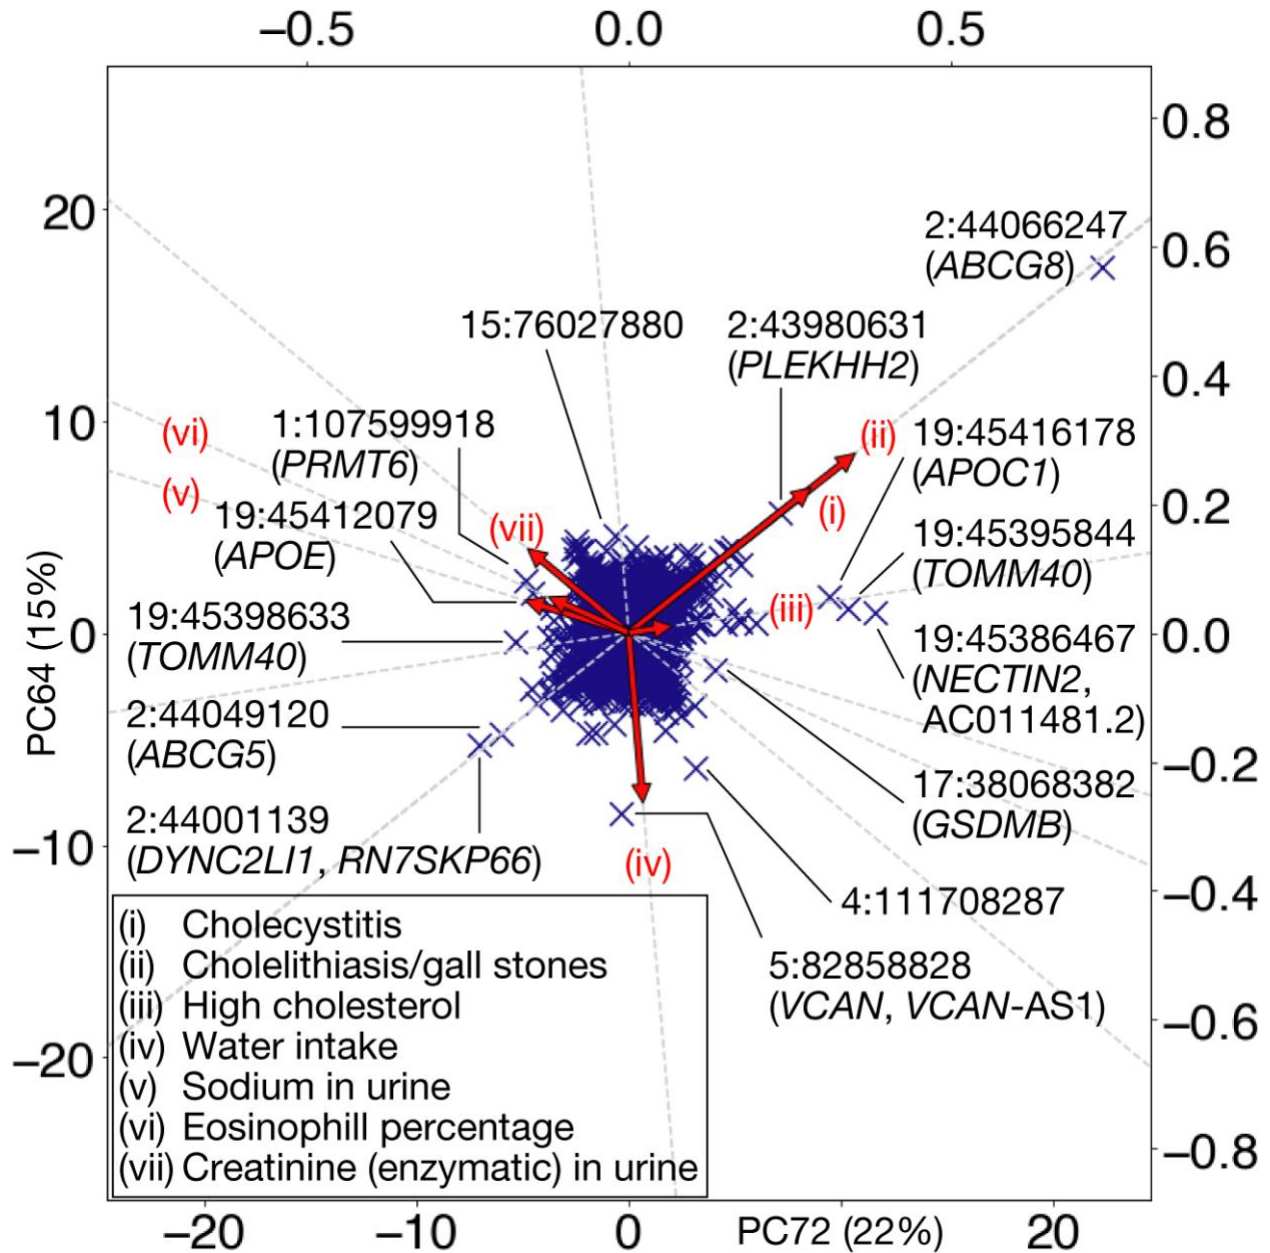

930  
 931 **Fig. S6** Variant PCA plot with biplot annotation for the top two key components for gallstones  
 932 using “all” dataset. Genetic variants projected into the top two key components, PC72  
 933 (horizontal axis) and PC64 (vertical axis). Variants are annotated with gene symbols. Directions  
 934 of genetic associations for relevant phenotypes are annotated as red arrows using the  
 935 secondary axes (Methods).

936

937 Fig. S7: GREAT enrichment analysis for MI

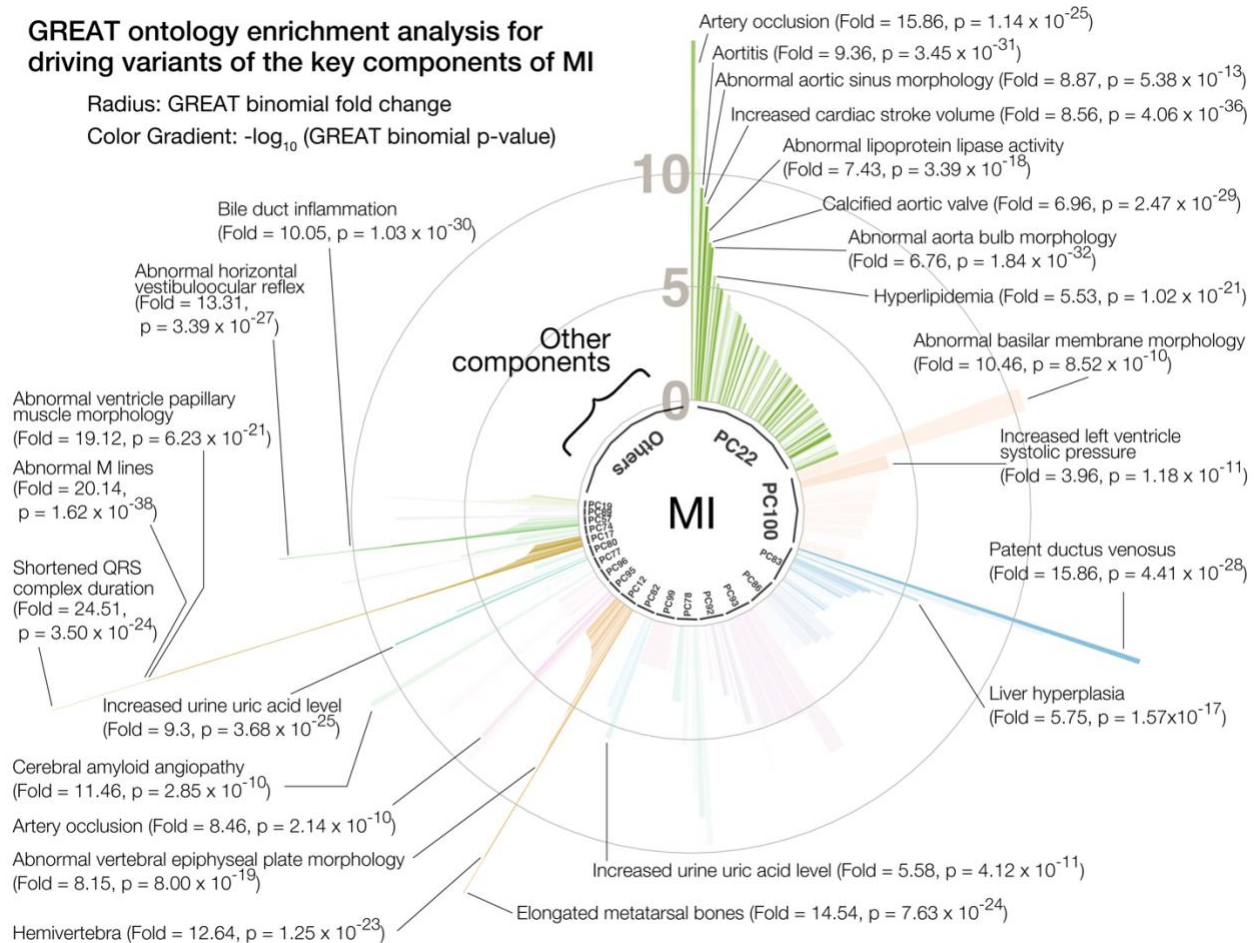

938  
939 **Fig. S7** Biological characterization of driving non-coding and coding variants of the key  
940 components for myocardial infarction (MI) with the genomic region enrichment analysis tool  
941 (GREAT) using the all variants dataset. The key components are shown proportional to their  
942 squared cosine score along with significantly enriched terms in mouse genome informatics  
943 (MGI) phenotype ontology. The radius represents binomial fold change and the color gradient  
944 represents p-value from GREAT ontology enrichment analysis.

945 **Fig. S8: GREAT ontology enrichment analysis for gallstones**

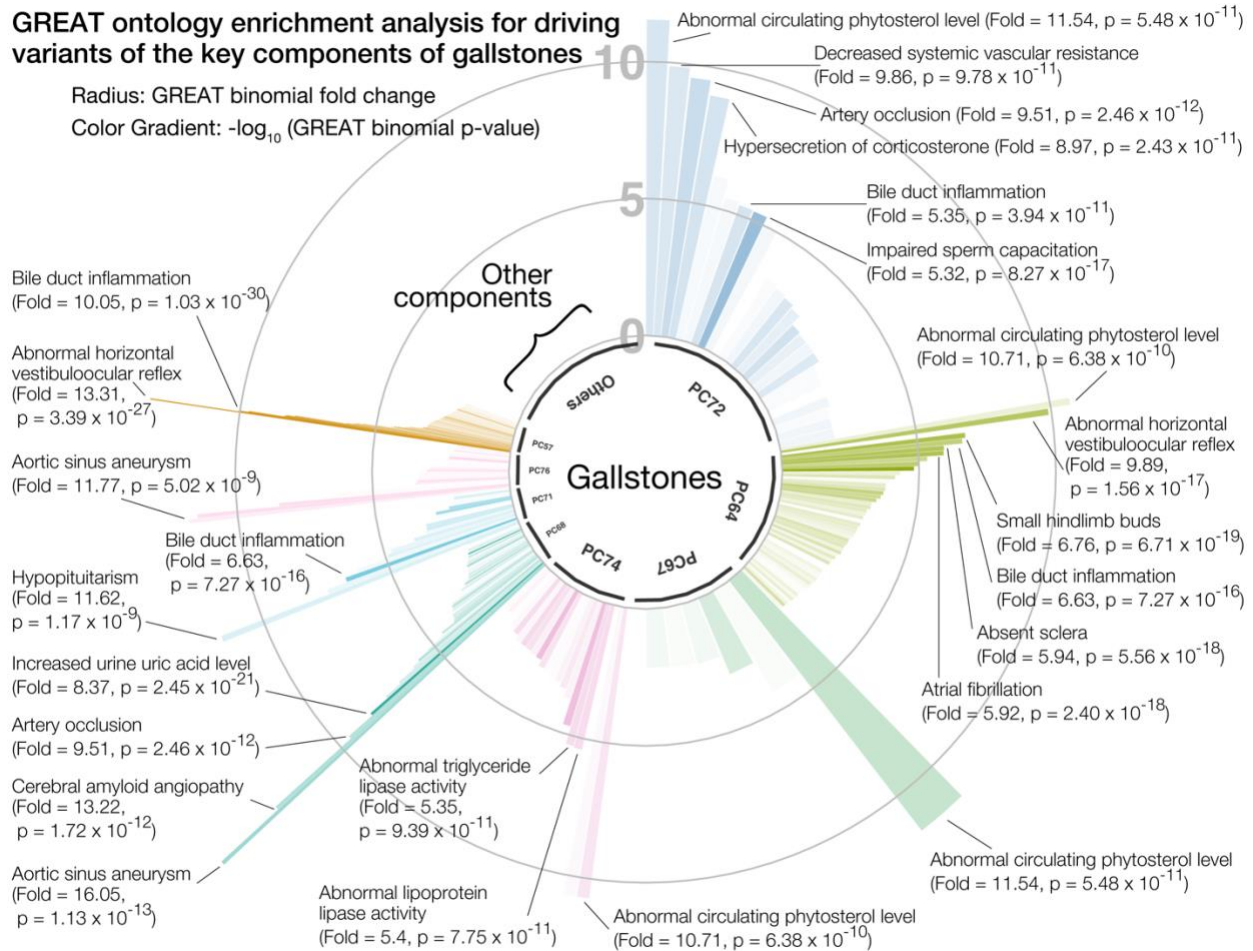

946  
947 **Fig. S8** Biological characterization of driving non-coding and coding variants of the key  
948 components for gallstones with the genomic region enrichment analysis tool (GREAT) using the  
949 all variants dataset. The key components are shown proportional to their squared cosine score  
950 along with significantly enriched terms in mouse genome informatics (MGI) phenotype ontology.  
951 The radius represents binomial fold change and the color gradient represents p-value from  
952 GREAT ontology enrichment analysis.

953 Fig. S9: Squared cosine score of BMI (PTVs dataset)

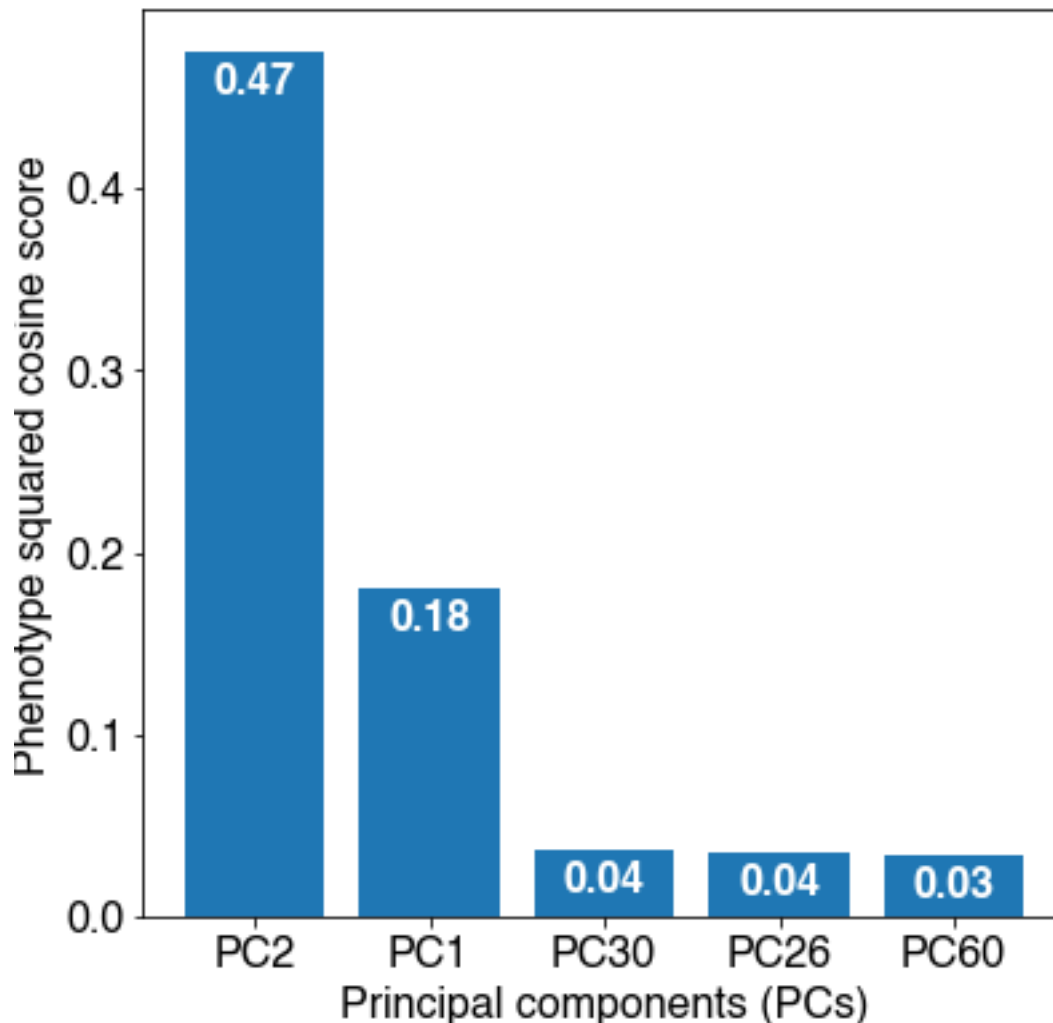

954  
955 **Fig. S9** Identification of the key components for BMI with phenotype squared cosine scores  
956 using the PTVs dataset. The top five key components are shown on the horizontal axis and the  
957 corresponding squared cosine scores are shown on the vertical axis.



958 **Fig. S10: PheWAS analysis for *PDE3B***

**a** PheWAS analysis of rs150090666 (*PDE3B*) for binary phenotypes

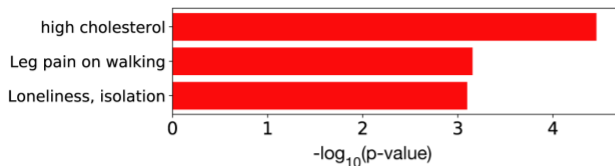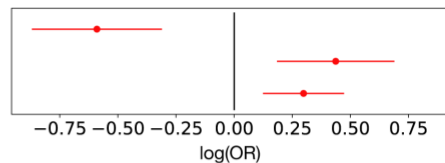

**b** PheWAS analysis of rs150090666 (*PDE3B*) for quantitative phenotypes

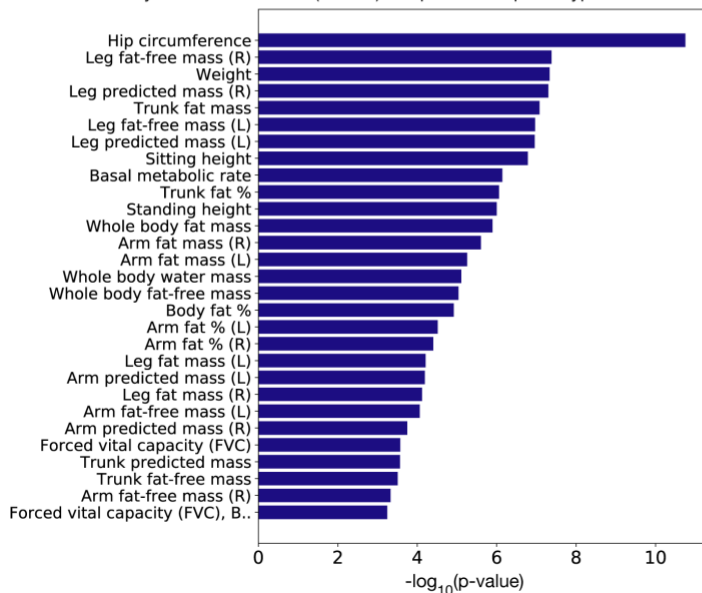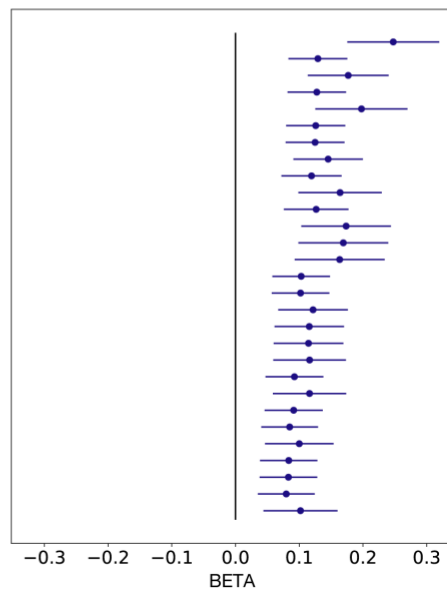

959  
 960 **Fig. S10** Phenome-wide association (PheWAS) analysis for rs150090666, a stop-gain variant in  
 961 *PDE3B*. The p-values (left) and log odds ratio (binary phenotypes, shown as red)  
 962 (quantitative phenotypes, shown as blue) (right) along with 95% confidence interval are shown  
 963 for the phenotypes with minimum case count of 1,000 (binary phenotypes, **a**) or 1,000  
 964 individuals with non-missing values (quantitative phenotypes, **b**) and strong association ( $p \leq$   
 965 0.001) and with this variants among all the phenotypes used in the study.

966 Fig. S11: Univariate regression analysis for *GPR151*

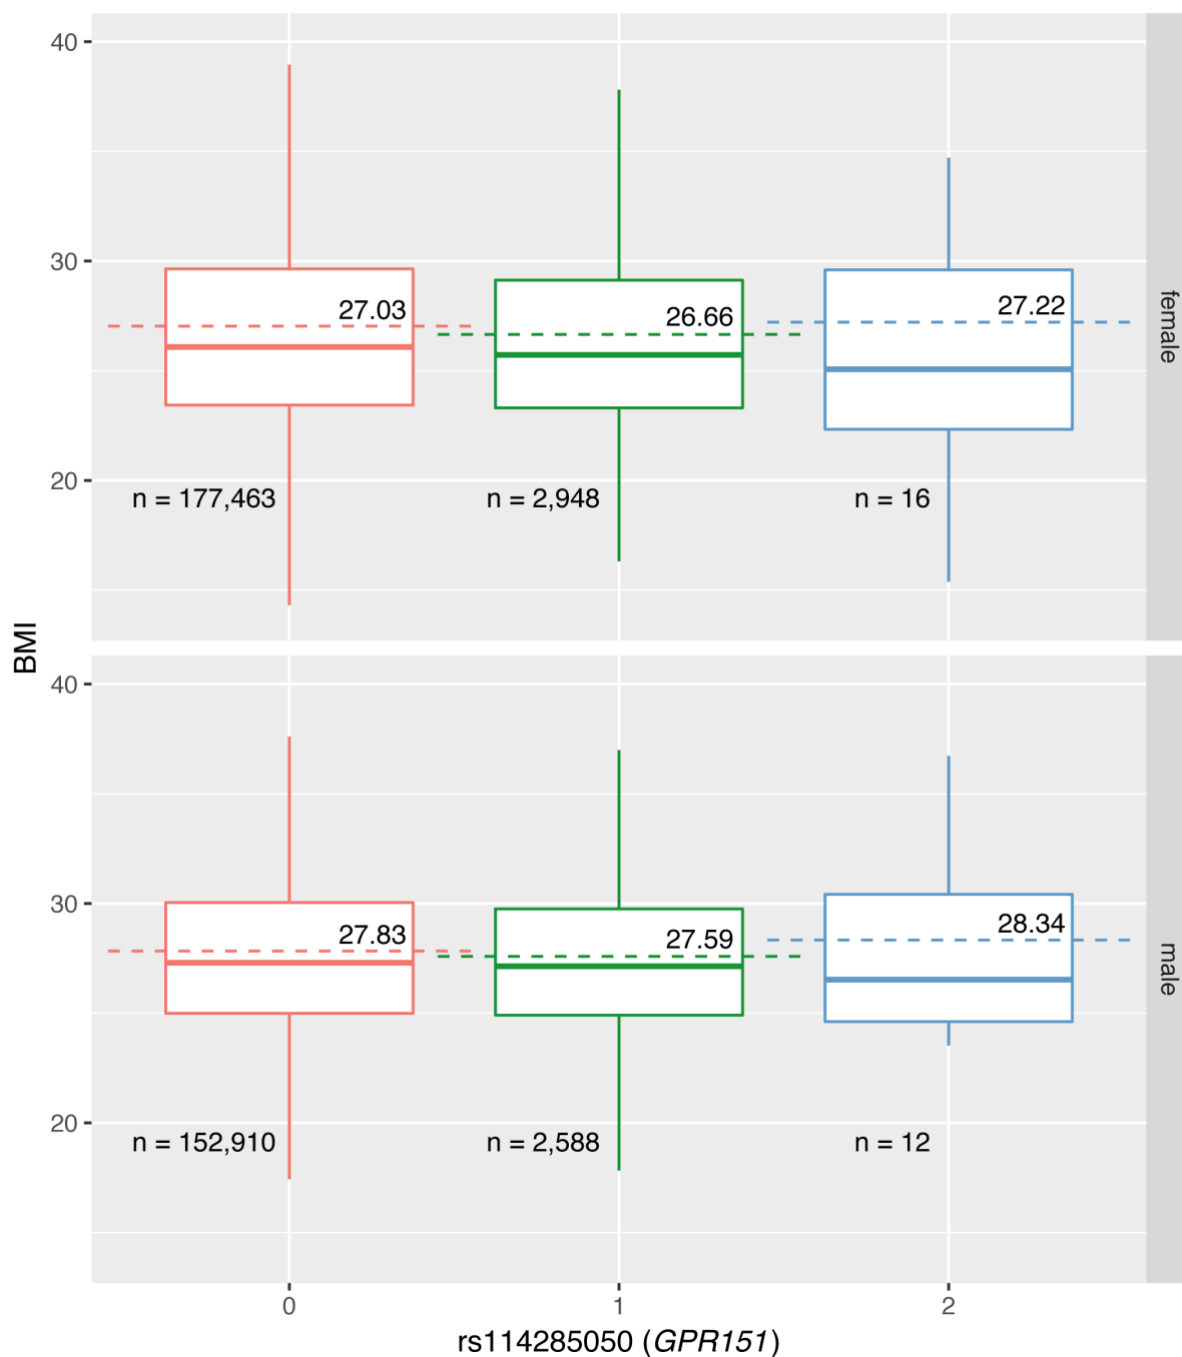

967  
968  
969  
970  
971  
972

**Fig. S11** Distribution of BMI stratified by sex and genotype of rs114285050, a stop-gain variant in *GPR151*. The outliers are removed from the plot and the mean values are annotated and shown as dashed lines. The number of carriers of the variants are shown at the bottom.

973 Fig. S12: Univariate regression analysis for *PDE3B*

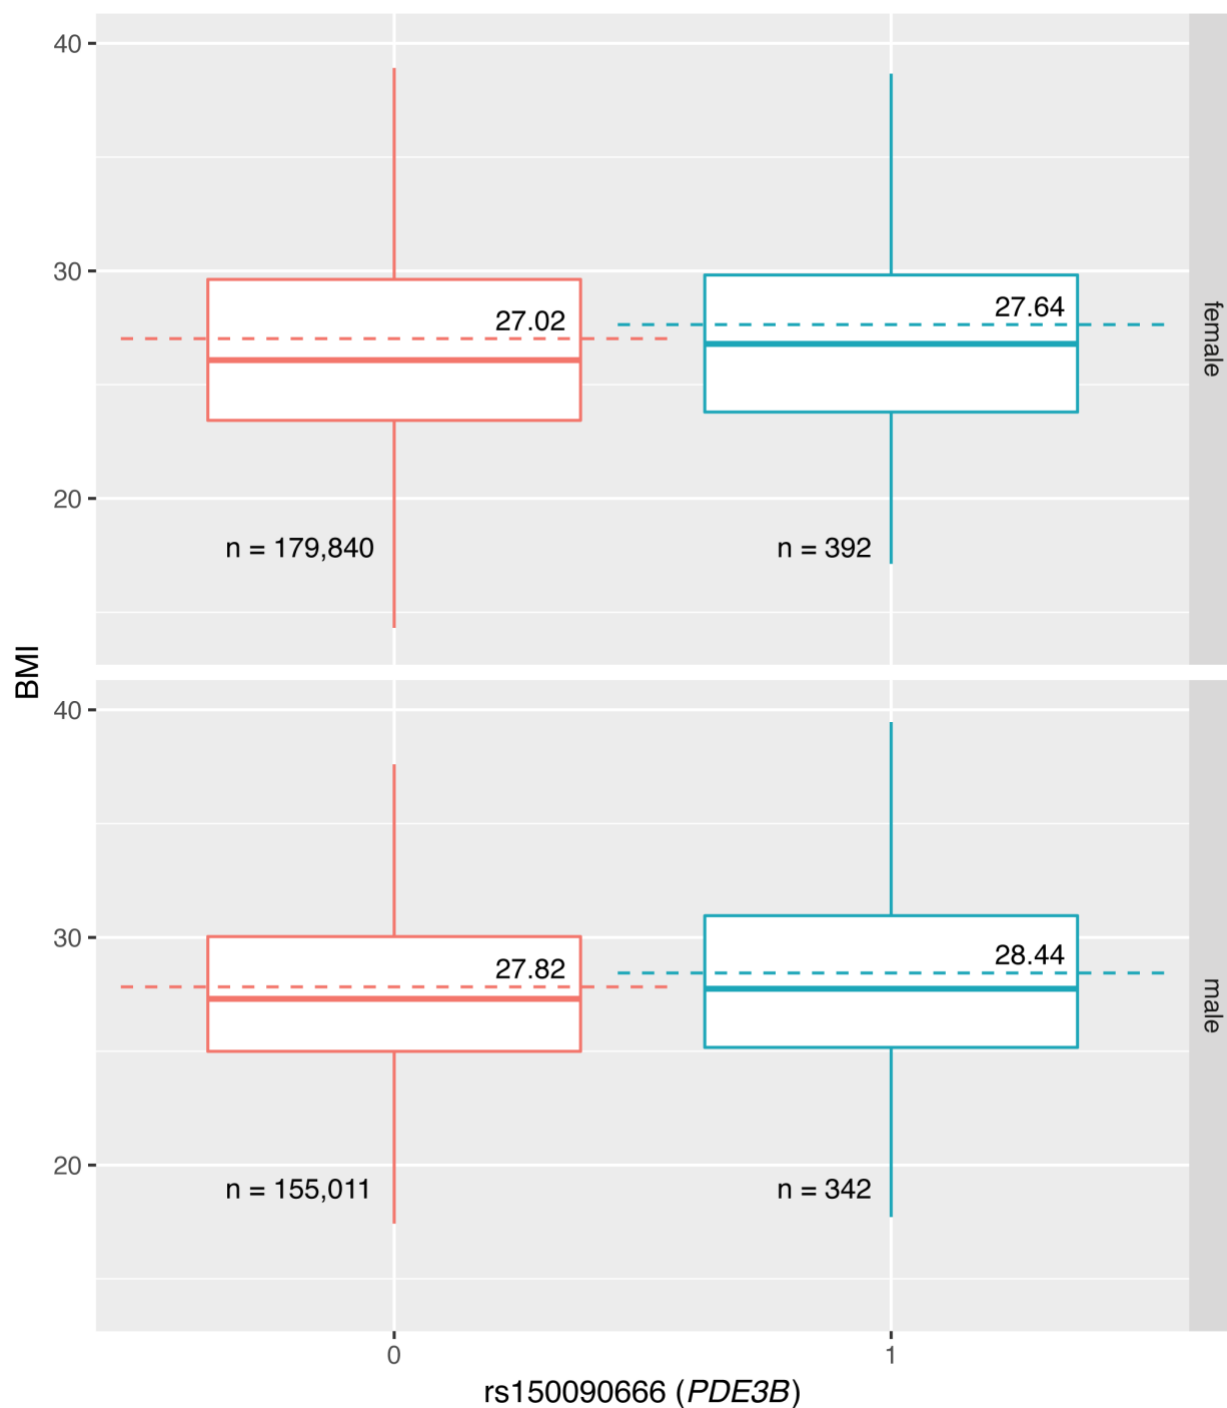

974  
975 **Fig. S12** Distribution of BMI stratified by sex and genotype of rs150090666, a stop-gain variant  
976 in *PDE3B*. The outliers are removed from the plot and the mean values are annotated and  
977 shown as dashed lines. The number of carriers of the variants are shown at the bottom.  
978

979 Fig. S13: *GPR151* overexpression

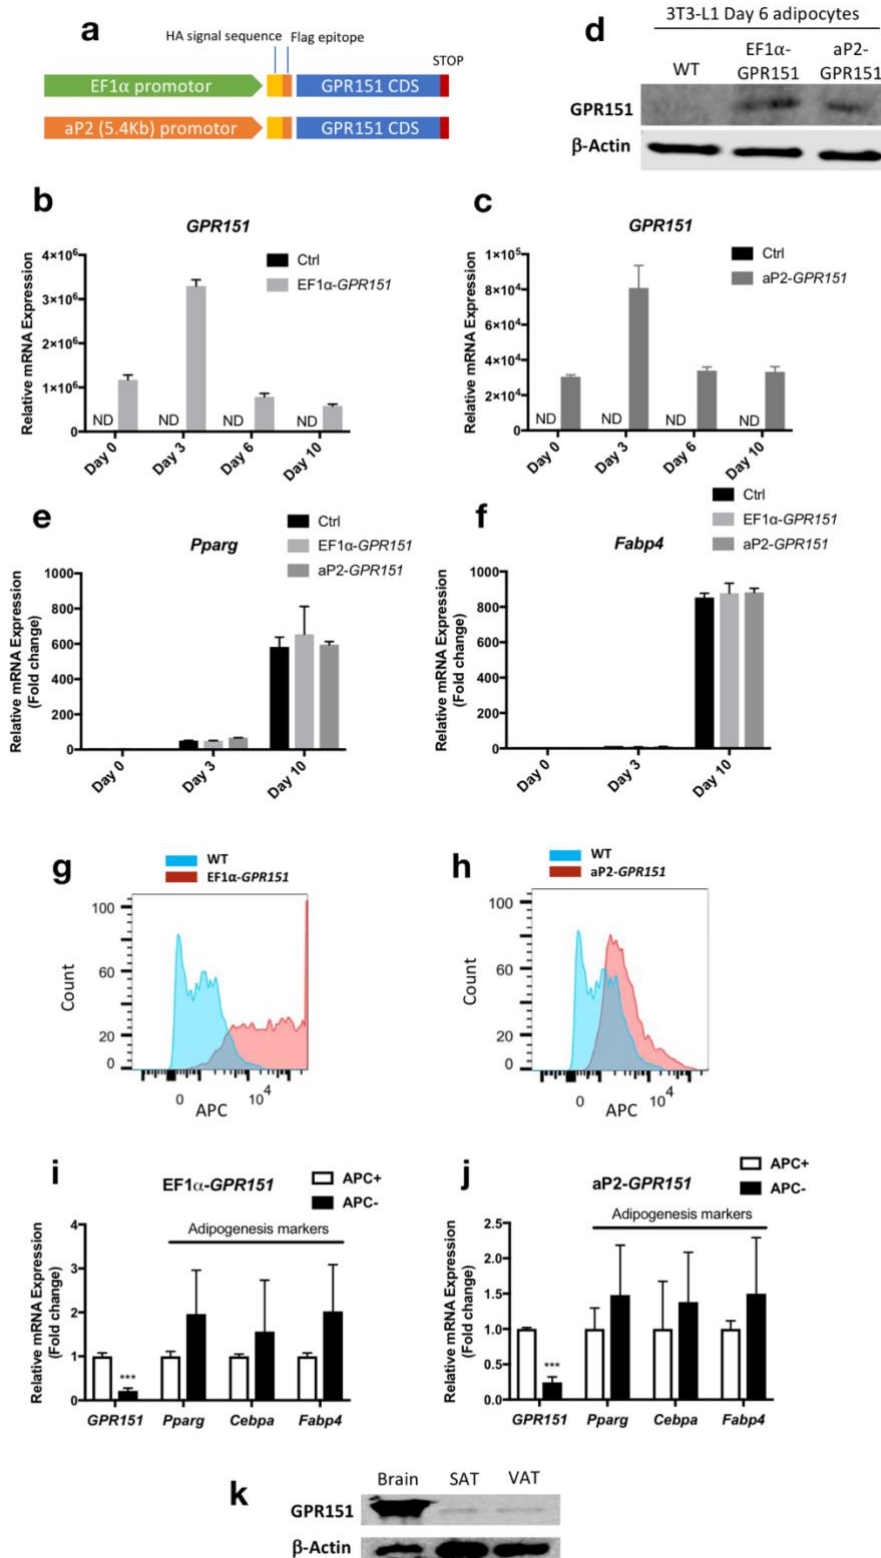

980  
 981  
 982

**Fig. S13** Effects of *GPR151* overexpression on 3T3-L1 adipogenesis. **a** Structure of *GPR151* overexpression construct driven by either EF1 $\alpha$  or aP2 promoter. **b-d** Confirmation of *GPR151*

983 overexpression at both mRNA (b-c) and protein levels (d) in 3T3-L1 cells during adipogenesis.  
984 e-f qPCR analysis of the effect of *GPR151* overexpression on adipogenesis markers, *Pparg* (e)  
985 and *Fabp4* (f). g-h FACS analysis of APC fluorescence in Day 6 3T3-L1 adipocytes infected  
986 with either EF1 $\alpha$ -*GPR151* (g) or aP2-*GPR151* (h) (shown in red), in comparison to wild-type  
987 (WT) cells (shown in blue). i-j Relative mRNA levels of *GPR151* and adipogenic markers  
988 (*Pparg*, *Cebpa*, *Fabp4*) in purified APC+ and APC- cells from Day 6 3T3-L1 adipocytes infected  
989 by either EF1 $\alpha$ -*GPR151* (i) or aP2-*GPR151* (j). k Comparison of protein levels of *GPR151* in  
990 mouse brain, subcutaneous adipose tissue (SAT) and visceral adipose tissue (VAT). ND: not-  
991 detectable.  
992

993 Fig. S14: *Pde3b* knockdown

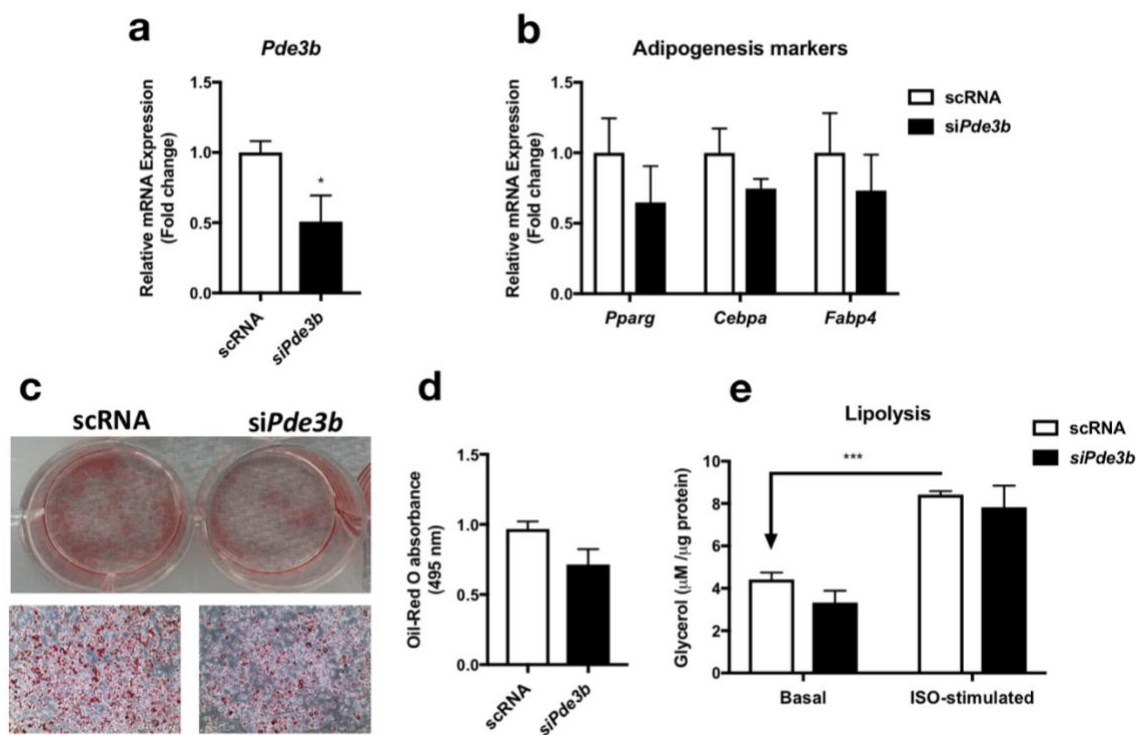

994 **Fig. S14** Effects of *Pde3b* knockdown in 3T3-L1 adipogenesis. **a** qPCR analysis of *Pde3b*  
995 mRNA knockdown in 3T3-L1 preadipocytes. **b** qPCR analysis of the effect of si*Pde3b*  
996 knockdown on adipogenesis markers, *Pparg*, *Cebpa* and *Fabp4*. **c-d** Oil-Red O staining (**c**) and  
997 quantification (**d**) of lipid droplets in scRNA- or si*Pde3b*-transfected adipocytes. **e** lipolysis  
998 assays of scRNA- or si*Pde3b*-transfected adipocytes. Means  $\pm$  SEM are shown (\*\*p-  
999 value<0.001, \*p-value<0.05). scRNA: scrambled siRNA. ISO: isoproterenol.  
1000

1001 **Table S1 List of phenotype categories**

1002 List of phenotype categories used in our study and their data source are shown with one  
 1003 example phenotype per category. Abbreviation in the type column. B: binary, Q: quantitative, P:  
 1004 described in previously published literature, F: the UK Biobank data field ID, and C: the UK  
 1005 Biobank data category ID.

1006

| Phenotype group name         | Type | Number of phenotypes | Example                            | Data source     |
|------------------------------|------|----------------------|------------------------------------|-----------------|
| Disease outcome              | B    | 363                  | Hypertension                       | P <sup>12</sup> |
| Cancer                       | B    | 46                   | Skin cancer                        | P <sup>12</sup> |
| Family History               | B    | 10                   | High blood pressure                | P <sup>12</sup> |
| Medication                   | B    | 709                  | Aspirin intake                     | F:20003         |
| Questionnaire (binary)       | Q    | 49                   | Wears glasses or contact lenses    | C:100025        |
| Imaging                      | Q    | 683                  | Volume of white matter             | C:100003        |
| Physical Measurement         | Q    | 122                  | Standing height                    | C:100006        |
| Assay                        | Q    | 34                   | Red blood cell (erythrocyte) count | C:100079        |
| Questionnaire (quantitative) | Q    | 62                   | Sleep duration                     | C:100079        |
| Miscellaneous (binary)       | B    | 19                   | Ever attempted suicide             |                 |
| Miscellaneous (quantitative) | Q    | 42                   | Number of medications taken        |                 |

1007

## 1008 Table S2 List of phenotypes

1009 The list of phenotypes considered in the study. The table is sorted by category, number cases  
 1010 (for binary phenotypes), and the number of non-missing values (for quantitative phenotypes).  
 1011 The two columns, "All" and "PTVs" indicates whether the phenotype is used in each of the  
 1012 dataset after imposing the filters on the genome-and phenome-wide summary statistics matrix.  
 1013 One can browse the summary statistics from genome-wide association studies on the Global  
 1014 Biobank Engine with the URL in the table.

1015 I am showing the first five lines of the table here. The full table is in Excel file.

| Category        | Phenotype name         | Number of cases | All | PTVs | Global Biobank Engine phenotype page (URL)                                                                    |
|-----------------|------------------------|-----------------|-----|------|---------------------------------------------------------------------------------------------------------------|
| Disease outcome | hypertension           | 107407          | Y   | Y    | <a href="https://biobankengine.stanford.edu/coding/HC215">https://biobankengine.stanford.edu/coding/HC215</a> |
| Disease outcome | essential hypertension | 64234           | Y   | Y    | <a href="https://biobankengine.stanford.edu/coding/HC273">https://biobankengine.stanford.edu/coding/HC273</a> |
| Disease outcome | asthma                 | 43626           | Y   | Y    | <a href="https://biobankengine.stanford.edu/coding/HC382">https://biobankengine.stanford.edu/coding/HC382</a> |
| Disease outcome | high cholesterol       | 43054           | Y   | Y    | <a href="https://biobankengine.stanford.edu/coding/HC269">https://biobankengine.stanford.edu/coding/HC269</a> |

1016

## 1017 Table S3: Phenotype groupings for visualization

1018 The list of phenotype groups used in the phenotype contribution score plots are summarized.

| Phenotype groups | List of phenotypes in the group |
|------------------|---------------------------------|
| fat-free         | Arm fat-free mass (left)        |
|                  | Arm fat-free mass (right)       |
|                  | Leg fat-free mass (left)        |
|                  | Leg fat-free mass (right)       |
|                  | Total fat-free mass             |
|                  | Trunk fat-free mass             |
|                  | Whole body fat-free mass        |
| fat              | Android fat mass                |
|                  | Android tissue fat percentage   |
|                  | Arm fat mass (left)             |

|           |                                   |
|-----------|-----------------------------------|
|           | Arm fat mass (right)              |
|           | Arm fat percentage (left)         |
|           | Arm fat percentage (right)        |
|           | Arm tissue fat percentage (left)  |
|           | Arm tissue fat percentage (right) |
|           | Arms fat mass                     |
|           | Arms tissue fat percentage        |
|           | Body fat percentage               |
|           | Gynoid fat mass                   |
|           | Gynoid tissue fat percentage      |
|           | Leg fat mass (left)               |
|           | Leg fat mass (right)              |
|           | Leg fat percentage (left)         |
|           | Leg fat percentage (right)        |
|           | Leg tissue fat percentage (left)  |
|           | Leg tissue fat percentage (right) |
|           | Legs fat mass                     |
|           | Legs tissue fat percentage        |
|           | Total fat mass                    |
|           | Total tissue fat percentage       |
|           | Trunk fat mass                    |
|           | Trunk fat percentage              |
|           | Trunk tissue fat percentage       |
|           | Whole body fat mass               |
| impedance | Impedance of arm (left)           |
|           | Impedance of arm (right)          |



|              |                                                                   |
|--------------|-------------------------------------------------------------------|
|              | Impedance of leg (left)                                           |
|              | Impedance of leg (right)                                          |
|              | Impedance of whole body                                           |
| reticulocyte | High light scatter reticulocyte count                             |
|              | High light scatter reticulocyte percentage                        |
|              | Immature reticulocyte fraction                                    |
|              | Mean reticulocyte volume                                          |
|              | Reticulocyte count                                                |
|              | Reticulocyte percentage                                           |
| meridian     | 3mm strong meridian (left)                                        |
|              | 3mm strong meridian (right)                                       |
|              | 3mm weak meridian (left)                                          |
|              | 3mm weak meridian (right)                                         |
|              | 6mm strong meridian (left)                                        |
|              | 6mm strong meridian (right)                                       |
|              | 6mm weak meridian (left)                                          |
|              | 6mm weak meridian (right)                                         |
| spirometry   | Forced expiratory volume in 1-second (FEV1)                       |
|              | Forced expiratory volume in 1-second (FEV1), Best measure         |
|              | Forced expiratory volume in 1-second (FEV1), predicted            |
|              | Forced expiratory volume in 1-second (FEV1), predicted percentage |
|              | Forced vital capacity (FVC)                                       |
|              | Forced vital capacity (FVC), Best measure                         |
|              | Peak expiratory flow (PEF)                                        |

1020 **Table S4: Summary of contribution scores for the key**  
 1021 **components**

1022 The list of top 20 driving phenotypes, genes, and variants for the first five principal components  
 1023 and the top three key components for the phenotypes highlighted in the study are summarized  
 1024 in the table.

1025 I am showing the first four lines of the table here. The full table is in Excel file.

| Dataset      | Phenotype of interest | PC | Squared cosine score | Rank | Phenotype                 | Phenotype contribution score | Gene   | Gene contribution score | Variant     | Variant contribution score | rsid     | GBE                                                                                                                         |
|--------------|-----------------------|----|----------------------|------|---------------------------|------------------------------|--------|-------------------------|-------------|----------------------------|----------|-----------------------------------------------------------------------------------------------------------------------------|
| All_variants | BMI                   | 2  | 47.44%               | 1    | Standing height           | 9.51%                        | FTO    | 1.52%                   | 16-53813367 | 0.97%                      | rs178174 | <a href="https://biobankengine.stanford.edu/variant/16-53813367">https://biobankengine.stanford.edu/variant/16-53813367</a> |
| All_variants | BMI                   | 2  | 47.44%               | 2    | Arm fat percentage (left) | 5.76%                        | ADCY3  | 0.31%                   | 16-53826034 | 0.28%                      | rs718796 | <a href="https://biobankengine.stanford.edu/variant/16-53826034">https://biobankengine.stanford.edu/variant/16-53826034</a> |
| All_variants | BMI                   | 2  | 47.44%               | 3    | Body fat percentage       | 5.64%                        | DNMT3A | 0.30%                   | 2-417167    | 0.27%                      | rs621062 | <a href="https://biobankengine.stanford.edu/variant/2-417167">https://biobankengine.stanford.edu/variant/2-417167</a>       |

1026

1027 **Table S5: GREAT enrichment analysis for BMI**

1028 Biological characterization of driving non-coding and coding variants of the key components for  
 1029 BMI with the genomic region enrichment analysis tool (GREAT) using the all variants dataset.

1030 The results of the enrichment analysis for MGI phenotype ontology, a manually curated  
 1031 genotype-phenotype relationship knowledgebase for mouse, is summarized by the key  
 1032 components. The two major summary statistics from GREAT, binomial fold and binomial p-  
 1033 value, are shown. Abbreviation. BFold: binomial fold, BPval: binomial p-value.

1034 Here, I'm showing the first 3 lines of the table. The full table is in Excel file.

| PC rank | PC  | Term                               | BFold | BPval    |
|---------|-----|------------------------------------|-------|----------|
| 1       | PC2 | brachypodia                        | 9.05  | 1.40E-23 |
| 1       | PC2 | abnormal pancreas topology         | 8.13  | 8.80E-12 |
| 1       | PC2 | abnormal urine catecholamine level | 7.32  | 5.19E-18 |

1035 **Table S6: GREAT enrichment analysis for MI**

1036 Biological characterization of driving non-coding and coding variants of the key components for  
 1037 MI with the genomic region enrichment analysis tool (GREAT) using the all variants dataset.

1038 The results of the enrichment analysis for MGI phenotype ontology, a manually curated

1039 genotype-phenotype relationship knowledgebase for mouse, is summarized by the key  
 1040 components. The two major summary statistics from GREAT, binomial fold and binomial p-  
 1041 value, are shown. Abbreviation. BFold: binomial fold, BPval: binomial p-value.

1042 **Here, I'm showing the first 3 lines of the table. The full table is in Excel file.**

| PC rank | PC   | Term                                   | BFold    | BPval    |
|---------|------|----------------------------------------|----------|----------|
| 1       | PC22 | artery occlusion                       | 1.59E+01 | 1.14E-25 |
| 1       | PC22 | aortic sinus aneurysm                  | 1.28E+01 | 3.88E-10 |
| 1       | PC22 | abnormal circulating phytosterol level | 1.07E+01 | 6.38E-10 |

### 1043 Table S7: GREAT enrichment analysis for gallstones

1044 Biological characterization of driving non-coding and coding variants of the key components for  
 1045 gallstones with the genomic region enrichment analysis tool (GREAT) using the all variants  
 1046 dataset. The results of the enrichment analysis for MGI phenotype ontology, a manually curated  
 1047 genotype-phenotype relationship knowledgebase for mouse, is summarized by the key  
 1048 components. The two major summary statistics from GREAT, binomial fold and binomial p-  
 1049 value, are shown. Abbreviation. BFold: binomial fold, BPval: binomial p-value.

1050 **Here, I'm showing the first 3 lines of the table. The full table is in Excel file.**

| PC rank | PC   | Term                                   | BFold    | BPval    |
|---------|------|----------------------------------------|----------|----------|
| 1       | PC72 | abnormal circulating phytosterol level | 1.15E+01 | 5.48E-11 |
| 1       | PC72 | decreased systemic vascular resistance | 9.86E+00 | 9.78E-11 |
| 1       | PC72 | artery occlusion                       | 9.51E+00 | 2.46E-12 |

### 1051 Table S8: PheWAS analysis for rs114285050 (*GPR151*)

1052 Phenome-wide association (PheWAS) analysis for rs114285050, a stop-gain variant in  
 1053 *GPR151*.

| GBE phenotype code | Name                 | Case   | -log <sub>10</sub> p-value | log(OR) or Beta | 1.96 * SE(log(OR)) or 1.96 * SE(beta) |
|--------------------|----------------------|--------|----------------------------|-----------------|---------------------------------------|
| BIN1960            | Fed-up feelings      | 136434 | 3.041                      | -0.09304        | 0.054978                              |
| INI48              | Waist circumference  | 336659 | 7.599                      | -0.06544        | 0.02301                               |
| INI23100           | Whole body fat mass  | 330970 | 6.87                       | -0.06872        | 0.025539                              |
| INI23128           | Trunk fat mass       | 331295 | 6.835                      | -0.07053        | 0.026284                              |
| INI23120           | Arm fat mass (right) | 331422 | 6.816                      | -0.06863        | 0.025617                              |
| INI23099           | Body fat percentage  | 331318 | 6.816                      | -0.05306        | 0.019816                              |

|          |                            |        |       |          |          |
|----------|----------------------------|--------|-------|----------|----------|
| INI23127 | Trunk fat percentage       | 331314 | 6.79  | -0.06356 | 0.023775 |
| INI21002 | Weight                     | 336260 | 6.654 | -0.06087 | 0.02303  |
| INI23116 | Leg fat mass (left)        | 331470 | 6.649 | -0.05468 | 0.020698 |
| INI23112 | Leg fat mass (right)       | 331488 | 6.62  | -0.05517 | 0.020933 |
| INI21001 | Body mass index (BMI)      | 336144 | 6.498 | -0.06789 | 0.026029 |
| INI23111 | Leg fat percentage (right) | 331491 | 6.341 | -0.04201 | 0.016327 |
| INI23124 | Arm fat mass (left)        | 331362 | 6.317 | -0.06587 | 0.025656 |
| INI23115 | Leg fat percentage (left)  | 331473 | 6.17  | -0.04087 | 0.016123 |
| INI23119 | Arm fat percentage (right) | 331445 | 5.424 | -0.04689 | 0.019874 |
| INI23123 | Arm fat percentage (left)  | 331395 | 5.048 | -0.04485 | 0.019796 |
| INI49    | Hip circumference          | 336620 | 4.649 | -0.05669 | 0.026205 |
| INI23126 | Arm predicted mass (left)  | 331345 | 4.211 | -0.03373 | 0.016499 |
| INI23125 | Arm fat-free mass (left)   | 331358 | 3.929 | -0.03257 | 0.01658  |
| INI23105 | Basal metabolic rate       | 331502 | 3.923 | -0.03368 | 0.017154 |
| INI23117 | Leg fat-free mass (left)   | 331454 | 3.423 | -0.03063 | 0.016887 |
| INI23118 | Leg predicted mass (left)  | 331449 | 3.336 | -0.02998 | 0.016776 |
| INI23121 | Arm fat-free mass (right)  | 331418 | 3.32  | -0.02894 | 0.016241 |
| INI23122 | Arm predicted mass (right) | 331413 | 3.176 | -0.02808 | 0.016174 |
| INI23102 | Whole body water mass      | 331510 | 3.044 | -0.02784 | 0.01644  |
| INI23114 | Leg predicted mass (right) | 331480 | 3.019 | -0.02812 | 0.016689 |

1054

1055 **Table S9: PheWAS analysis for rs150090666 (*PDE3B*)**

1056 Phenome-wide association (PheWAS) analysis for rs150090666, a stop-gain variant in *PDE3B*.

1057

| <b>GBE phenotype code</b> | <b>Name</b>           | <b>Case</b> | <b>-log<sub>10</sub> p-value</b> | <b>log(OR) or Beta</b> | <b>1.96 * SE(log(OR)) or 1.96 * SE(beta)</b> |
|---------------------------|-----------------------|-------------|----------------------------------|------------------------|----------------------------------------------|
| HC269                     | high cholesterol      | 43054       | 4.457                            | -0.5904                | 0.279692                                     |
| BIN4728                   | Leg pain on walking   | 28151       | 3.154                            | 0.4366                 | 0.252448                                     |
| BIN2020                   | Loneliness, isolation | 60153       | 3.098                            | 0.2983                 | 0.174322                                     |
| INI49                     | Hip circumference     | 336620      | 10.75                            | 0.2476                 | 0.072167                                     |

|          |                                           |        |       |         |          |
|----------|-------------------------------------------|--------|-------|---------|----------|
| INI23113 | Leg fat-free mass (right)                 | 331480 | 7.381 | 0.1293  | 0.046197 |
| INI21002 | Weight                                    | 336260 | 7.333 | 0.1769  | 0.063445 |
| INI23114 | Leg predicted mass (right)                | 331480 | 7.3   | 0.1276  | 0.045884 |
| INI23128 | Trunk fat mass                            | 331295 | 7.079 | 0.1977  | 0.072304 |
| INI23117 | Leg fat-free mass (left)                  | 331454 | 6.965 | 0.1259  | 0.046432 |
| INI23118 | Leg predicted mass (left)                 | 331449 | 6.958 | 0.1249  | 0.046119 |
| INI20015 | Sitting height                            | 336513 | 6.783 | 0.1454  | 0.054449 |
| INI23105 | Basal metabolic rate                      | 331502 | 6.141 | 0.1193  | 0.047177 |
| INI23127 | Trunk fat percentage                      | 331314 | 6.059 | 0.1641  | 0.065405 |
| INI50    | Standing height                           | 336500 | 6     | 0.1266  | 0.050725 |
| INI23100 | Whole body fat mass                       | 330970 | 5.895 | 0.1736  | 0.070227 |
| INI23120 | Arm fat mass (right)                      | 331422 | 5.601 | 0.1692  | 0.070462 |
| INI23124 | Arm fat mass (left)                       | 331362 | 5.255 | 0.1635  | 0.070521 |
| INI23102 | Whole body water mass                     | 331510 | 5.107 | 0.1031  | 0.045198 |
| INI23101 | Whole body fat-free mass                  | 331486 | 5.039 | 0.1021  | 0.045119 |
| INI23099 | Body fat percentage                       | 331318 | 4.919 | 0.1217  | 0.054508 |
| INI23123 | Arm fat percentage (left)                 | 331395 | 4.516 | 0.1158  | 0.054429 |
| INI23119 | Arm fat percentage (right)                | 331445 | 4.401 | 0.1146  | 0.054645 |
| INI23116 | Leg fat mass (left)                       | 331470 | 4.208 | 0.1163  | 0.056918 |
| INI23126 | Arm predicted mass (left)                 | 331345 | 4.189 | 0.09246 | 0.045374 |
| INI23112 | Leg fat mass (right)                      | 331488 | 4.119 | 0.1162  | 0.057565 |
| INI23125 | Arm fat-free mass (left)                  | 331358 | 4.061 | 0.09128 | 0.04559  |
| INI23122 | Arm predicted mass (right)                | 331413 | 3.746 | 0.085   | 0.044472 |
| INI3062  | Forced vital capacity (FVC)               | 309028 | 3.572 | 0.1001  | 0.053841 |
| INI23130 | Trunk predicted mass                      | 331203 | 3.565 | 0.08357 | 0.045002 |
| INI23129 | Trunk fat-free mass                       | 331234 | 3.508 | 0.08307 | 0.045158 |
| INI23121 | Arm fat-free mass (right)                 | 331418 | 3.326 | 0.07965 | 0.044649 |
| INI20151 | Forced vital capacity (FVC), Best measure | 255494 | 3.243 | 0.102   | 0.058016 |
